# Supplementary material for: A Supervised Network Analysis on Gene Expression Profiles of Breast Tumors Predicts a 41-Gene Prognostic Signature of the Transcription Factor MYB across Molecular Subtypes
Source: Comput Math Methods Med. 2014 Feb 3;2014:813067. doi: 10.1155/2014/813067 (PMC3930188; doi:10.1155/2014/813067)

**Supplementary information**

**Title:** A supervised network analysis on gene expression profiles of breast tumors predicts a 41- gene prognostic signature of the transcription factor *MYB* across molecular subtypes

**Table of content (Pages 1-8)**

**Suppls.1-4** are summarized gene pools in four combined illustrations with sets of their corresponding Venn diagrams. An unique table consists of suppl.1, 2, 3 and 4. The listed gene symbols are transcription factors and components of interest within this table except eight hundred ninety one of the gene symbols are left as “blank” within the table based on annotation provided by Gene Spring GX7.3.1 (March, 2011). The gene symbols high-lighted with light blue are transcription factors, transcription factor subunits and transcript variants of transcription factors. The remaining gene symbols are molecules of interest in this study. We only mark “Y” in a row of the assigned column that means the gene symbol to be one of the components listed in the analysis of interest. The gene symbols in the Venn diagrams are defined as follows. The gene symbols written by lower cases that are the gene probe names for gene probes having more than one transcripts. The gene symbols written by upper cases that are the gene names derived either from combined gene probe names or from the gene with only one corresponding transcript. For instance, *ARNT2* consists of two probe names – *arnt2* and *arnt2.1*. *arnt2.1* is a transcript variant of *arnt2* (data not shown). *MYB* stands for a gene with a corresponding transcript.

**Suppl. 5** has the prognostic values of transcription factors in the *MYB* subnetworks (Figure 7 and Table S4.10) in 90A cohort (groups IE and IIE) and 181A cohort, respectively.

**Suppl. 6** contains heatmaps for (1) the common gene pools shared by six signal transduction pathway and the network of *MYB\_ARNT2* in 90A cohort, respectively. (2) the common gene pools shared by three relevant clinical parameters and the clinically significant network of *MYB\_ARNT2* in 90A cohort, respectively.

**Suppl. 7** includes the meanplots for mRNA levels for *POU2F1*(9472), *POU2F1*(11991), *SALL2*(3096), *XBPI*(10024), *MYBL1*(C11830) and *MYBL2*(10757) in eight clinical categories and in three cohorts of infiltrating ductal carcinoma (IDCs), respectively.

**Suppl. 8** shows the gene expression pattern of the prognostic relevant signature (41

probes) in relation to the gene expression pattern of four transcription factors in five cohorts, respectively.

## **Suppls. 1-4 (Pages 9-186)**

### **Suppl. 1**

**Table S1.1.** Clinicopathological significant cluster of histological grade (grade), tubule formation (TF) and nuclear pleomorphism (NP) in 181 infiltrating ductal breast carcinomas.

**Table S1.2.** Clinicopathological significant cluster of mitotic count, grade, TF and NP in 181 infiltrating ductal breast carcinomas.

**Table S1.3.** The overlapping network of *MYB* and *ARNT2* predicted to be relevant in 61 group IE and 91 ER(-) infiltrating ductal breast carcinomas.

**Table S1.4.** The overlapping network of *MYB* and *ARNT2* predicted to be relevant in 29 group IIE and 91 ER(-) infiltrating ductal breast carcinomas.

**Table S1.5.** The overlapping network of *MYB* and *ARNT2* predicted to be relevant to grade, MC, NP and TF in 181 infiltrating ductal breast carcinomas.

**Table S1.6.** The overlapping network of *MYB* and *ARNT2* predicted to be relevant to both ER(-) and two subtypes of ER(+) infiltrating ductal breast carcinomas.

**Table S1.7.** The overlapping bivariate network of *MYB* and *ARNT2* predicted to be relevant to two subtypes of ER(+) - groups IE and IIE and to 91 ER(-) infiltrating ductal breast carcinomas.(5,158 probes)

**Table S1.8.** The MYB\_ARNT2 network derived from combining both univariate (Table S1.6) and bivariate (Table S1.7) networks of *MYB* and *ARNT2* relevant to 181 infiltrating ductal breast carcinomas. (6,603 probes)

**Table S1.9.** The MYB\_ARNT2 network derived from combining both univariate (Table S1.5) and bivariate (Table S1.12) networks of *MYB* and *ARNT2* relevant to clinicaopathological parameters in 181 infiltrating ductal breast carcinomas. (2,922 probes)

**Table S1.10.** The MYB\_ARNT2 network not only relevant to grade, NP, TF and MC (Table S1.9) but also to 181 infiltrating ductal breast carcinomas (Table S1.8). (2,727probes)

**Table S1.11.** The overlapping bivariate network of *MYB* and *ARNT2* predicted to be relevant grade, MC and NP in 181 infiltrating ductal breast carcinomas.

**Table S1.12.** The overlapping bivariate network of *MYB* and *ARNT2* predicted to be relevant grade, MC, NP and TF in 181 infiltrating ductal breast carcinomas.

## **Suppl. 2**

**Table S2.1.** Clinicopathological significant cluster of grade, LVI and TF in 90 infiltrating ductal breast carcinomas.

**Table S2.2.** Clinicopathological significant cluster of grade, LVI, TF, NP and tumor size (size) in 90 infiltrating ductal breast carcinomas.

**Table S2.3.** Clinicopathological significant cluster of grade, LVI, TF, NP, tumor size (size) and LNM in 90 infiltrating ductal breast carcinomas.

## **Suppl. 3**

**Table S3.1.** The overlapping network of *MYB* and *ARNT2* relevant to histological grade in 90 ER(+) infiltrating ductal breast carcinomas.

**Table S3.2.** The overlapping network of *MYB* and *ARNT2* relevant to LNM in 90 ER(+) infiltrating ductal breast carcinomas.

**Table S3.3.** The overlapping network of *MYB* and *ARNT2* relevant to LVI in 90 ER(+) infiltrating ductal breast carcinomas.

**Table S3.4.** The overlapping network of *MYB* and *ARNT2* relevant to NP in 90 ER(+) infiltrating ductal breast carcinomas.

**Table S3.5.** The overlapping network of *MYB* and *ARNT2* relevant to tumor size in 90ER(+) infiltrating ductal breast carcinomas.

**Table S3.6.** The overlapping network of *MYB* and *ARNT2* relevant to TF in 90 ER(+) infiltrating ductal breast carcinomas.

**Table S3.7.** The overlapping network of *MYB* and *ARNT2* relevant to grade, LNM and LVI in 90 ER(+) infiltrating ductal breast carcinomas.

**Table S3.8.** The overlapping network of *MYB* and *ARNT2* relevant to grade, LNM, LVI, NP and TF in 90 ER(+) infiltrating ductal breast carcinomas.

**Table S3.9.** The overlapping network of *MYB* and *ARNT2* relevant to grade, LNM, LVI, NP, TF and size in 90 ER(+) infiltrating ductal breast carcinomas.

**Table S3.10.** The overlapping univariate network of *MYB* and *ARNT2* relevant to an ER(+) subtype – group IE in 90 ER(+) infiltrating ductal breast carcinomas.

**Table S3.11.** The overlapping univariate network of *MYB* and *ARNT2* relevant to an ER(+) subtype – group IIE in 90 ER(+) infiltrating ductal breast carcinomas.

**Table S3.12.** The overlapping univariate network of *MYB* and *ARNT2* relevant to two ER(+) subtypes – groups IE and IIE in 90 ER(+) infiltrating ductal breast carcinomas.

**Table S3.13.** The MYB\_ARNT2 network derived from combining both univariate (Table S3.12) and bivariate (Table S3.19) networks of *MYB* and *ARNT2* relevant to two ER(+) subtypes – groups IE and IIE in 90 ER(+) infiltrating ductal breast carcinomas. (4,982 probes)

**Table S3.14.** The MYB\_ARNT2 network derived from combining both univariate (Table S3.9) and bivariate (Table S3.19) network of *MYB* and *ARNT2* relevant to grade, NP, TF, LNM, LVI and tumor size in 90 ER(+) infiltrating ductal breast carcinomas. (727 probes)

**Table S3.15.** The MYB\_ARNT2 network not only relevant to grade, NP, TF, LNM, LVI and tumor size (Table S3.14) but also to two ER(+) subtypes – groups IE and IIE (Table S3.13) in 90 ER(+) infiltrating ductal breast carcinomas. (480 probes)

**Table S3.16.** The overlapping bivariate network of *MYB* and *ARNT2* relevant to grade, NP and TF in 90 ER(+) infiltrating ductal breast carcinomas.

**Table S3.17.** The overlapping bivariate network of *MYB* and *ARNT2* relevant to grade, NP, TF, LNM and LVI in 90 ER(+) infiltrating ductal breast carcinomas.

**Table S3.18.** The overlapping bivariate network of *MYB* and *ARNT2* relevant to grade, NP, TF, LNM, LVI and tumor size in 90 ER(+) infiltrating ductal breast carcinomas.

**Table S3.19.** The overlapping bivariate network of *MYB* and *ARNT2* relevant to two ER(+) subtypes – groups IE and IIE in 90 ER(+) infiltrating ductal breast carcinomas.

#### **Suppl. 4**

**Table S4.1.** The overlapping gene pool between network of 90\_CS\_MYB\_ARNT2 and the prognosis predictors significant in 181, 91 and 90 infiltrating ductal breast carcinomas (or network of Feature type I\_90\_CS\_MYB\_ARNT2). Surv. 90 stands for probes to be significant in Kaplan-Meier survival analysis for 90A cohort. Likewise, Surv. 91 and Surv. 181 are based on such definition except in different cohorts.

**Table S4.2.** The overlapping gene pool between network of 90\_CS\_MYB\_ARNT2 and prognosis predictors significant in both 181 and 90 infiltrating ductal breast carcinomas (or network of Feature type II\_90\_CS\_MYB\_ARNT2). Not Surv. 181 stands for probes to be not significant in Kaplan-Meier survival analysis for 181A cohort.

**Table S4.3.** The overlapping gene pool between network of 90\_CS\_MYB\_ARNT2 and prognosis predictors significant in both 90 and 91 infiltrating ductal breast carcinomas (or network of Feature type III\_90\_CS\_MYB\_ARNT2).

**Table S4.4.** The overlapping gene pool between network of 90\_CS\_MYB\_ARNT2 and prognosis predictors significant in 90 infiltrating ductal breast carcinomas (or network of Feature type IV\_90\_CS\_MYB\_ARNT2).

**Table S4.5.** The overlapping gene pool between network of 181\_CS\_MYB\_ARNT2 and prognosis predictors significant in 91, 181 and 90 infiltrating ductal breast carcinomas (or network of Feature type I\_181\_CS\_MYB\_ARNT2).

**Table S4.6.** The overlapping gene pool between network of 181\_CS\_MYB\_ARNT2 and prognosis predictors significant in both 181 and 90 infiltrating ductal breast carcinomas (or network of Feature type II\_181\_CS\_MYB\_ARNT2).

**Table S4.7.** The overlapping gene pool between network of 181\_CS\_MYB\_ARNT2 and prognosis predictors significant in both 181 and 91 infiltrating ductal breast carcinomas (or network of Feature type III\_181\_CS\_MYB\_ARNT2).

**Table S4.8.** The overlapping gene pool between network of 181\_CS\_MYB\_ARNT2 and prognosis predictors significant in 181 infiltrating ductal breast carcinomas (or network of Feature type IV\_181\_CS\_MYB\_ARNT2).

**Table S4.9.** The overlapping gene pool between network of Feature type II\_90\_CS\_MYB\_ARNT2 and network of Feature type II\_181\_CS\_MYB\_ARNT2.

**Table S4.10.** The overlapping gene pool between 41 prognostic predictors and the common gene pool shared by the networks of *MYBL1* and *MYBL2* in 90A cohort.

#### **Suppl. 5. (Pages 187-194)**

**Figure S5.1.** The prognostic prediction of E2F1(7852), MYB(5586), MYBL1(C11830), MYBL2(10757) and XBP1(10024) in different cohorts (90A cohort, 181A cohort) by Kaplan-Meier survival analysis.

**Figure S5.2.** The prognostic prediction of ARNT2(3742), ARNT2(3187), POU2F1(947), POU2F1(11991), and SALL2(3096) in different cohorts (90A cohort, 181A cohort) by Kaplan-Meier survival analysis.

**Table S5.1.** The ANOVA results of 41-gene signature in 90A cohort. The relevant clinicopathological characteristics for *MYB* and/or *ARNT2* are bolded. The p values of ANOVA tests to be less or equal to 0.05 are high-lighted with light blue. The gene symbols with no clinical significance are high-lighted with light yellow.

**Table S5.2.** The ANOVA results of 41-gene signature in 181A cohort. The relevant clinicopathological characteristics for *MYB* and/or *ARNT2* are bolded. The p values of ANOVA tests to be less or equal to 0.05 are high-lighted with light blue. The gene symbols with no clinical significance are high-lighted with light yellow.

**Table S5.3.** Clinicopathological characteristics of four subcohorts of infiltrating ductal breast carcinomas.

**Table S5.4.** Univariate and multivariate analyses for survival on prognostic factors in 90A and 181A cohorts, respectively. The p values of t test in the COX proportional hazard model to be less or equal to 0.05 are high-lighted with light blue. The definitions for subcohorts A, B, C and D are in Figure 6 (see main text). Subcohort nonA stands for 90A cohort without subcohort A. Subcohort nonC stands for 181A cohort without subcohort C.

## **Suppl. 6. (Pages 195-201)**

**Figure S6.1.** Heatmaps for the common gene pool in both cell cycle signal transduction pathway and the network of *MYB\_ARNT2* in 90A cohort.

**Figure S6.2.** Heatmaps for the common gene pool in both VEGF signal transduction pathway and the network of *MYB\_ARNT2* in 90A cohort.

**Figure S6.3.** Heatmaps for the common gene pool in both p53 signal transduction pathway and the network of *MYB\_ARNT2* in 90A cohort.

**Figure S6.4.** Heatmaps for the common gene pool in both ribosome signal transduction pathway and the network of *MYB\_ARNT2* in 90A cohort.

**Figure S6.5.** Heatmaps for the common gene pool in both PDGFRB signal transduction pathway and the network of *MYB\_ARNT2* in 90A cohort.

**Figure S6.6.** Heatmaps for the common gene pool in both ERBB2 signal transduction pathway and the network of *MYB\_ARNT2* in 90A cohort.

**Figure S6.7.** Heatmaps for the common gene pool significant for both histological grade (Grade) and the network of *MYB\_ARNT2* in 90A cohort.

**Figure S6.8.** Heatmaps for the common gene pool significant for both lymphovascular invasion (LVI) and the network of *MYB\_ARNT2* in 90A cohort.

**Figure S6.9.** Heatmaps for the common gene pool significant for both tumor size (size) and the network of *MYB\_ARNT2* in 90A cohort.

**Figure S6.10.** The most relevant subnetworks of *MYB*, *ARNT2* and *SALL2* for epithelial-to-mesenchymal transition (EMT) activities in 90A cohort.

**Table S6.1.** . Partial results of the supervised network analysis in Tables S1.3 and S1.4 show *MYB* and *ARNT2* shared target genes (57 genes) overlapping with the downstream target genes of *ARNT2/SIM1*.

**Suppl. 7. (Pages 202-213)**

**Figure S7.1.** Mean plot analyses of mRNA levels for *POU2F1*(9472) in eight clinical categories and in three cohorts of infiltrating ductal carcinoma (IDCs), respectively.

**Figure S7.2.** Mean plot analyses of mRNA levels for *POU2F1*(11991) in eight clinical categories and in three cohorts of infiltrating ductal carcinoma (IDCs), respectively.

**Figure S7.3.** Mean plot analyses of mRNA levels for *SALL2* (3096) in eight clinical categories and in three cohorts of infiltrating ductal carcinoma (IDCs), respectively.

**Figure S7.4.** Mean plot analyses of mRNA levels for *XBPI* (10024) in eight clinical categories and in three cohorts of infiltrating ductal carcinoma (IDCs), respectively.

**Figure S7.5.** Mean plot analyses of mRNA levels for *MYBL1*(C11830) in eight clinical categories and in three cohorts of infiltrating ductal carcinoma (IDCs), respectively.

**Figure S7.6.** Mean plot analyses of mRNA levels for *MYBL2*(10757) in eight clinical categories and in three cohorts of infiltrating ductal carcinoma (IDCs), respectively.

**Suppl. 8. (Page 214)**

**Figure S8.1.** The heatmaps for the expression pattern of forty one probes in relation to the gene expression patterns of the four transcription factors (*ARNT2*, *MYB*, *MYBL1* and *MYBL2*) in three cohorts.

**Figure S8.2.** The heatmaps for the expression pattern of forty one probes in relation to the gene expression patterns of the four transcription factors (*ARNT2*, *MYB*, *MYBL1* and *MYBL2*) in two cohorts.

S1.1

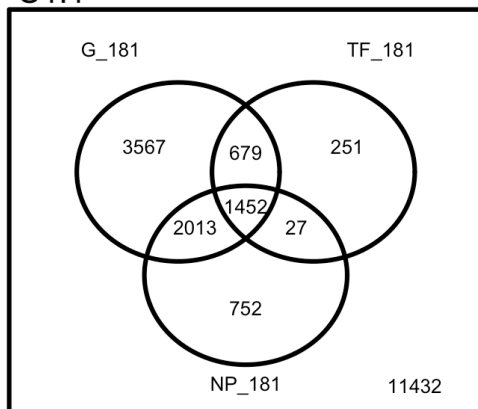

S1.2

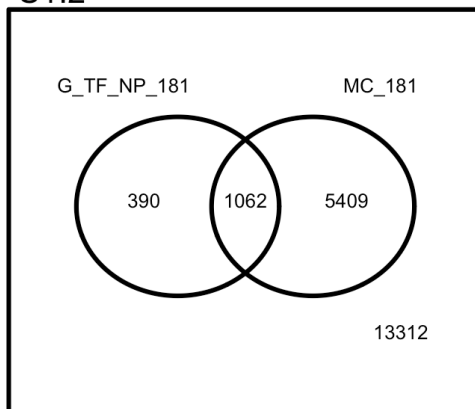

S1.3

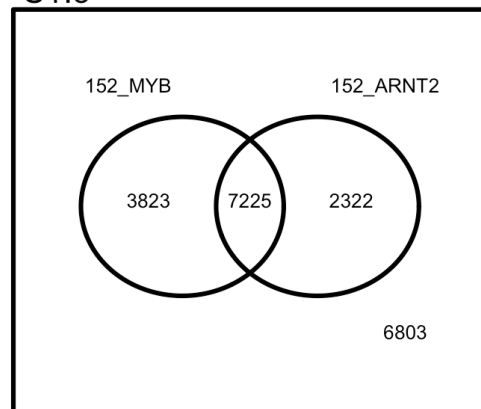

S1.4

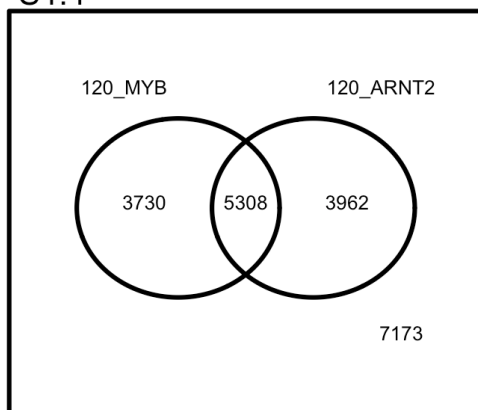

S1.5

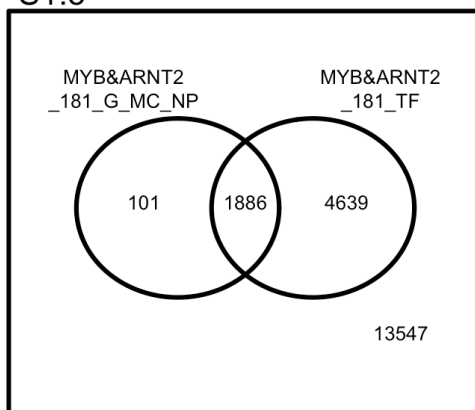

S1.6

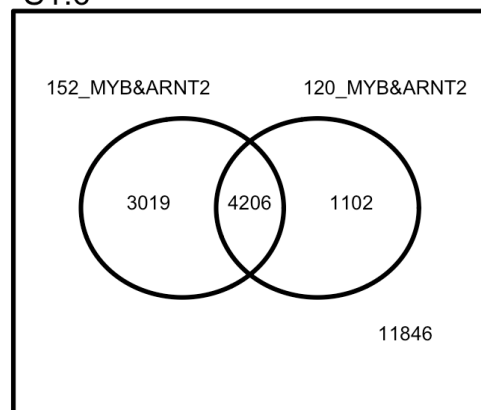

S1.7

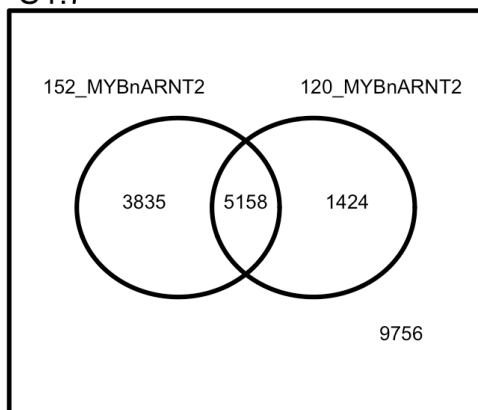

S1.8

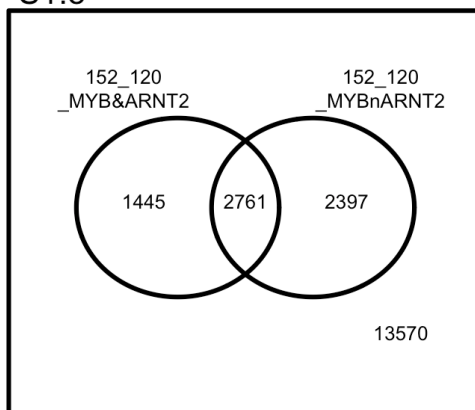

S1.9

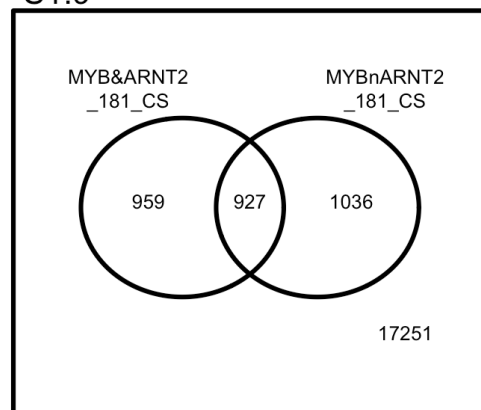

S1.10

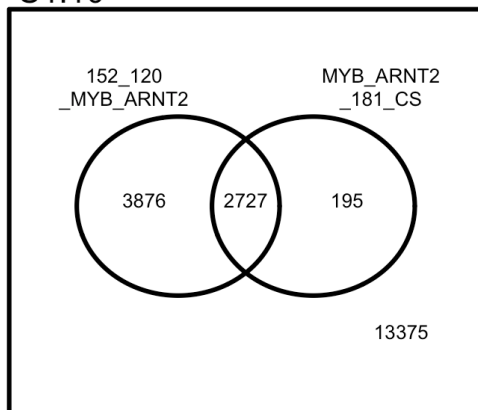

S1.11

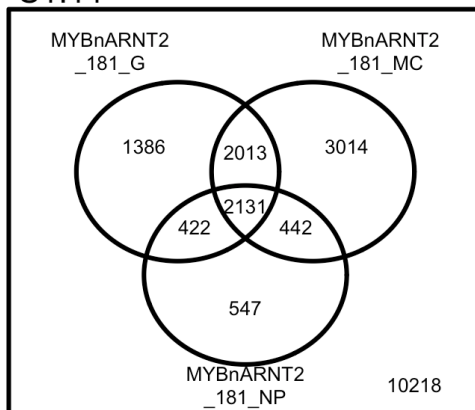

S1.12

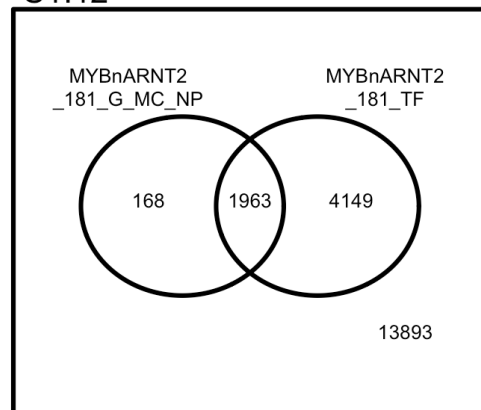

S2.1

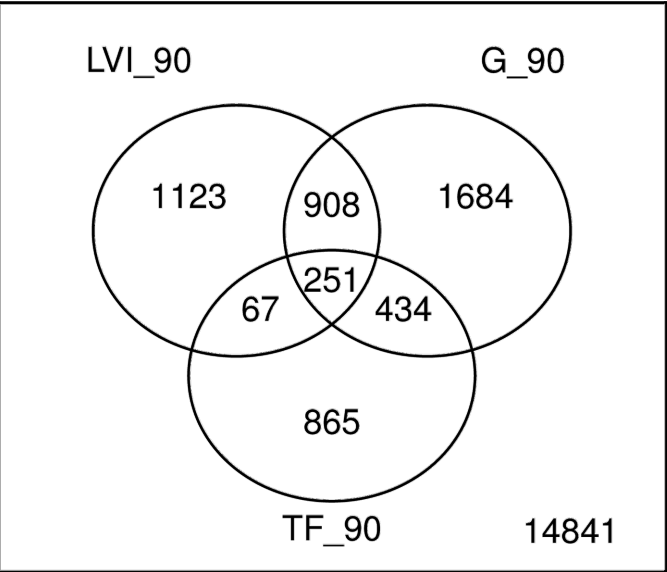

S2.2

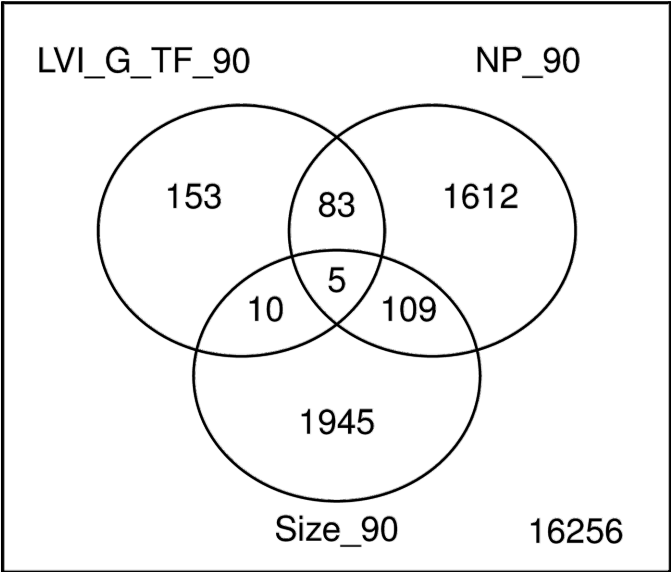

S2.3

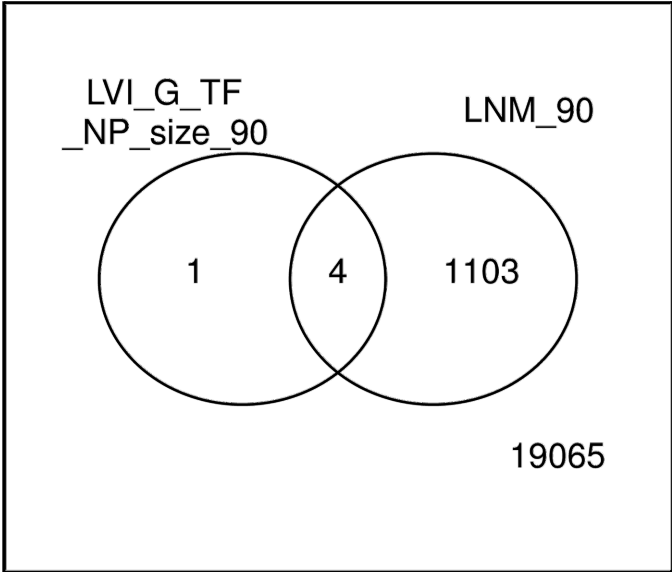

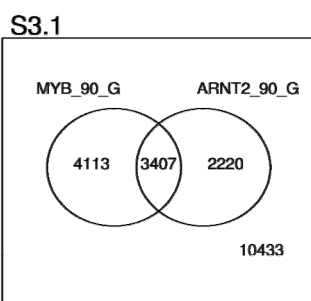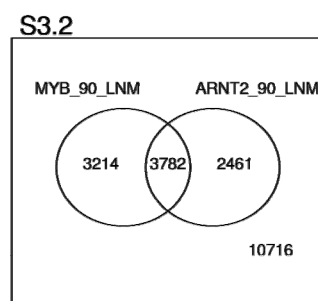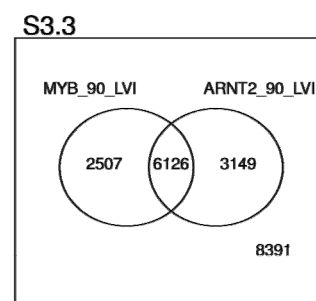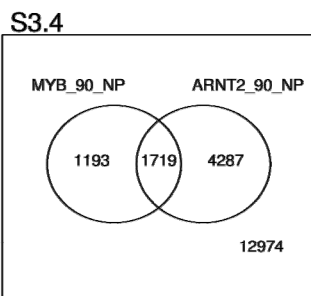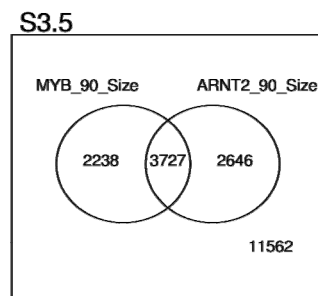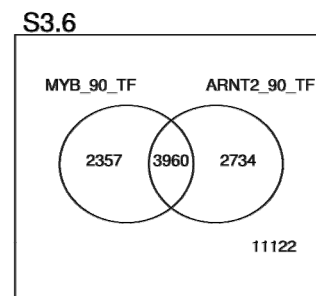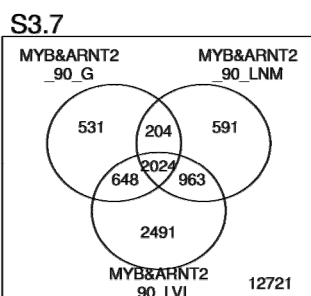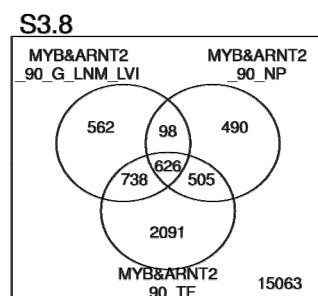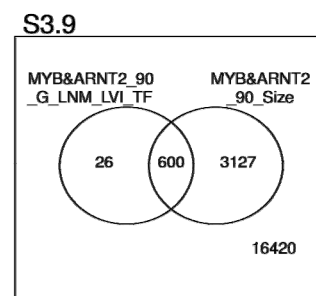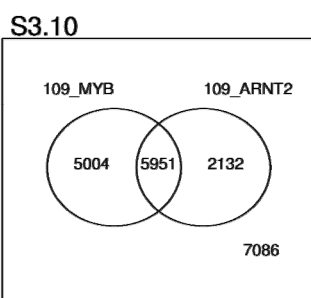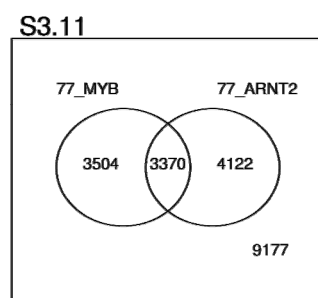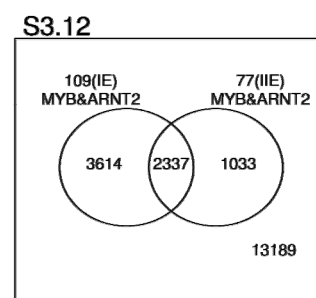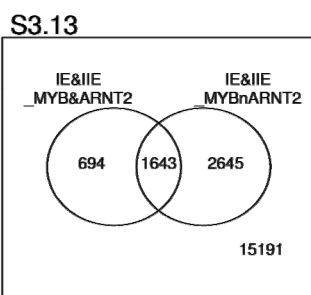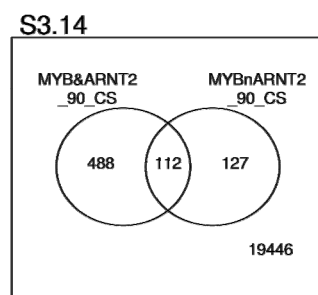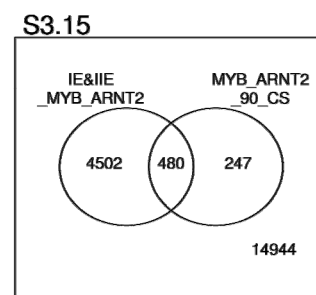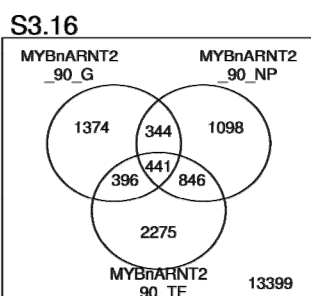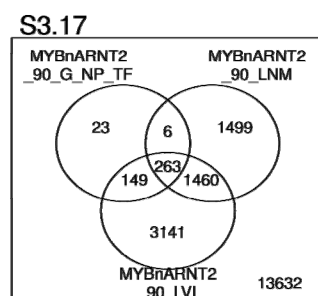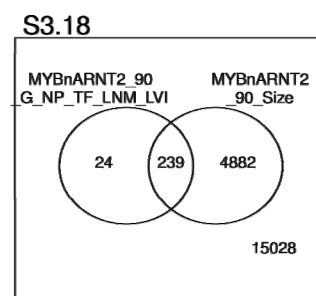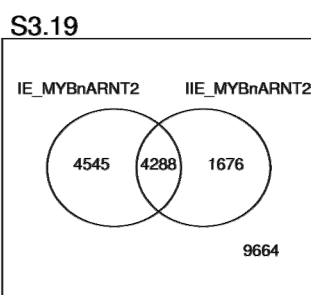

S4.1 90 feature type I

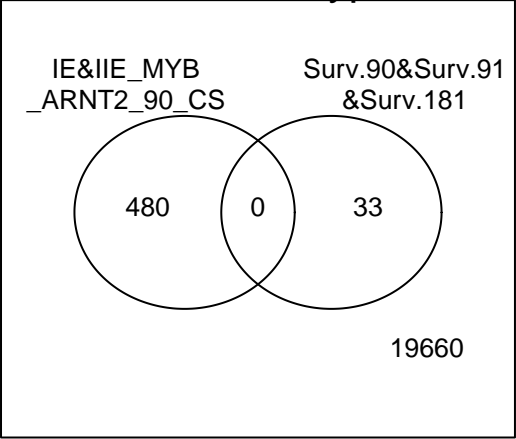

S4.2 90 feature type II

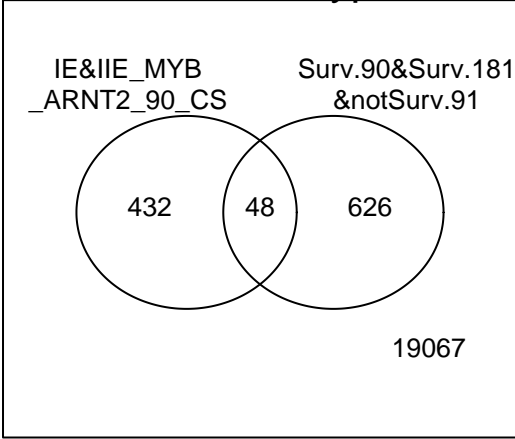

S4.3 90 feature type III

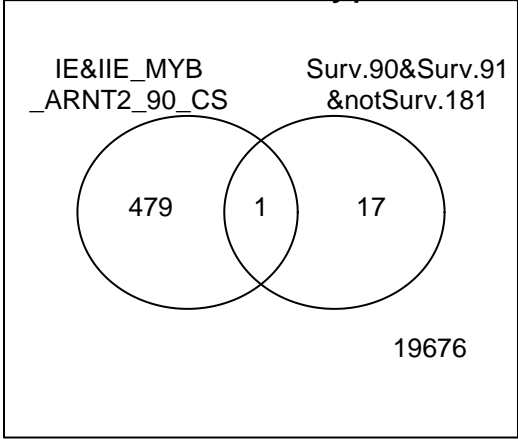

S4.4 90 feature type IV

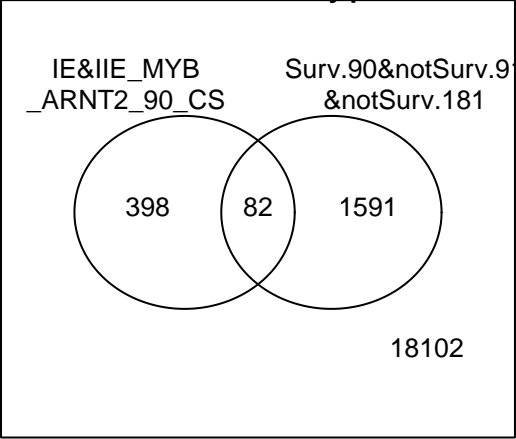

S4.5 181 feature type I

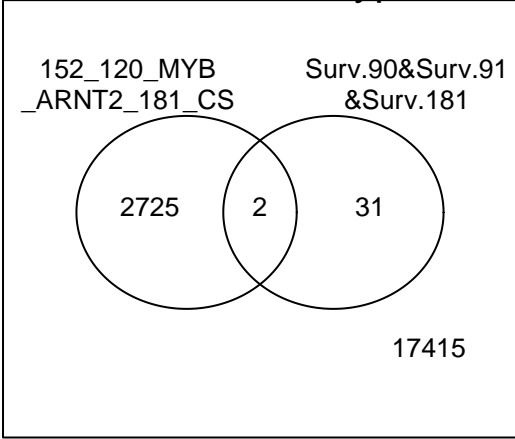

S4.6 181 feature type II

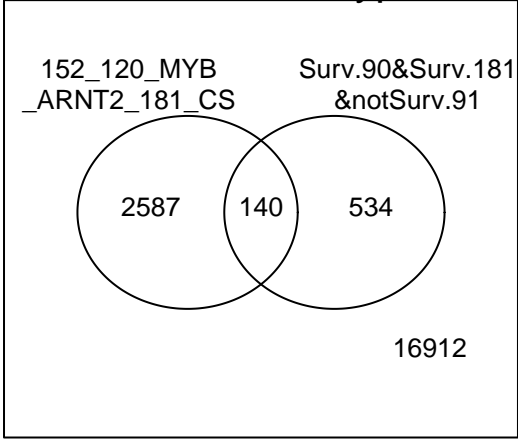

S4.7 181 feature type III

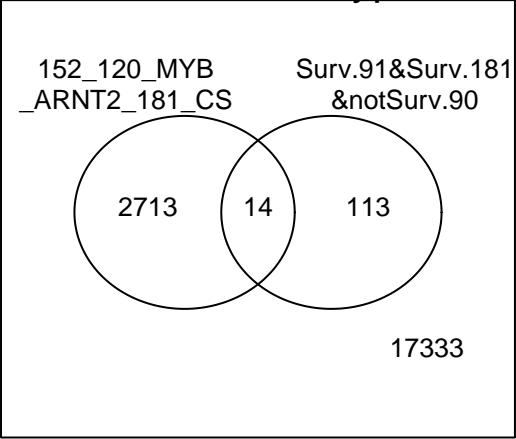

S4.8 181 feature type IV

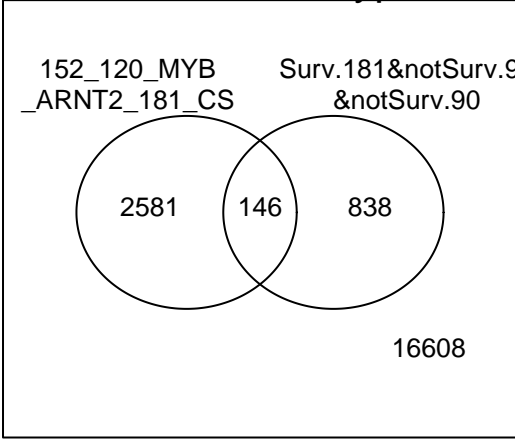

S4.9

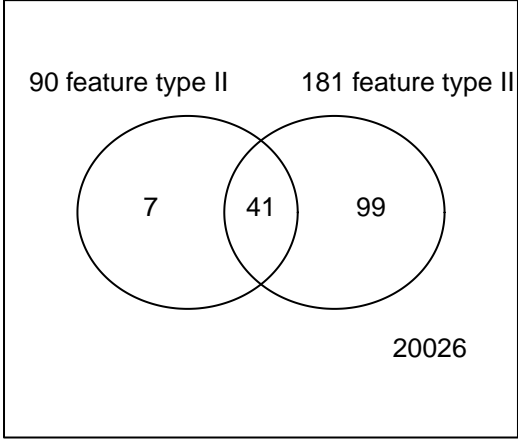

S4.10

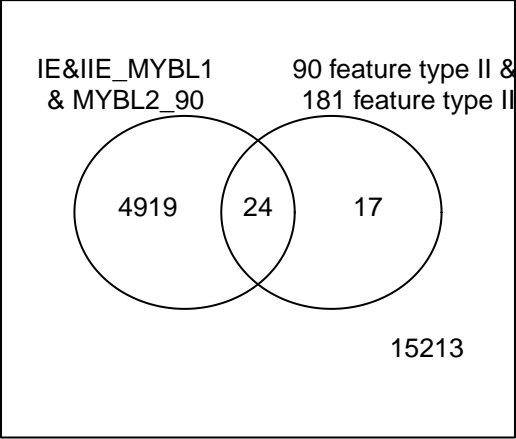



[illegible]





































[illegible]



















[illegible]

[illegible]

[illegible]

[illegible]

[illegible]

[illegible]

[illegible]



[illegible]

[illegible]

[illegible]

[illegible]

[illegible]

[illegible]

[illegible]

[illegible]

[illegible]

[illegible]

[illegible]

[illegible]

[illegible]

[illegible]

[illegible]

[illegible]

[illegible]

[illegible]

[illegible]

[illegible]

[illegible]

[illegible]

[illegible]

[illegible]

[illegible]

[illegible]

[illegible]

[illegible]

[illegible]



[illegible]

[illegible]

[illegible]

[illegible]

[illegible]

[illegible]

[illegible]

[illegible]

[illegible]

[illegible]

[illegible]

[illegible]

[illegible]

[illegible]

[illegible]

[illegible]

[illegible]

[illegible]

[illegible]

[illegible]

[illegible]











[illegible]

[illegible]

[illegible]

[illegible]

[illegible]

[illegible]

[illegible]

[illegible]

[illegible]

[illegible]

[illegible]

[illegible]

[illegible]

[illegible]

[illegible]

[illegible]

[illegible]

[illegible]

[illegible]

[illegible]

[illegible]

**Figure S5.1.** The prognostic prediction of E2F1(7852), MYB(5586), MYBL1(C11830), MYBL2(10757) and XBP1(10024) in different cohorts (90A cohort, 181A cohort) by Kaplan-Meier survival analysis. Some of analyses have missing data to cause the final sample number less than 90 or 181. 7852, 5586, C11830, 10757 and 10024 are the Agilent feature number for *E2F1*, *MYB*, *MYBL1*, *MYBL2* and *XBP1*, respectively.

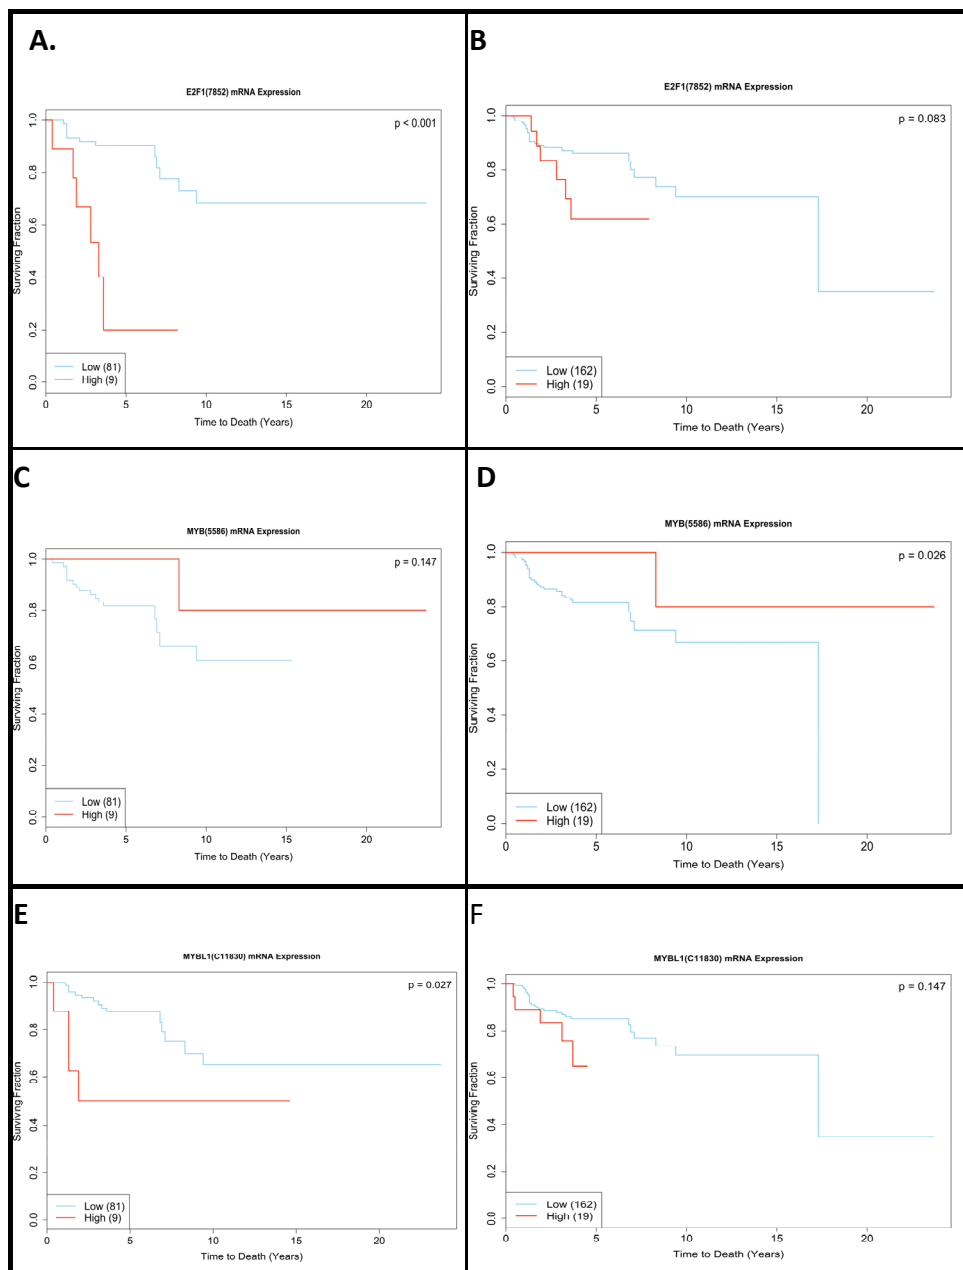

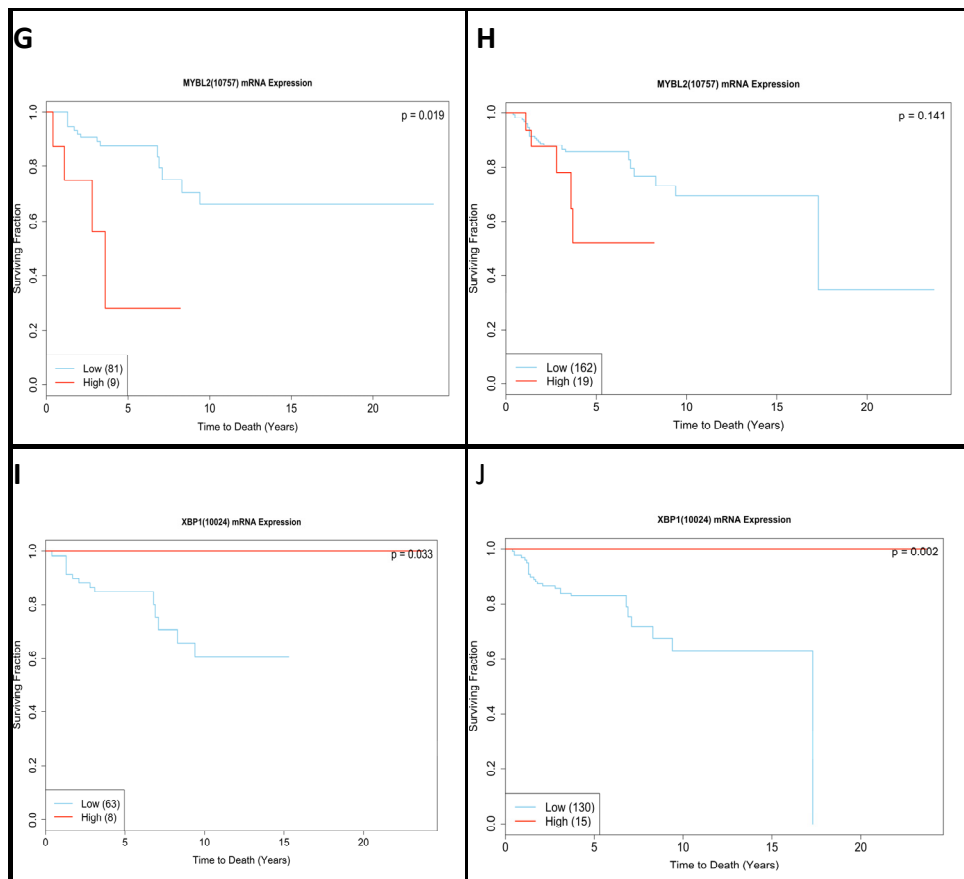

**Figure S5.2.** The prognostic prediction of ARNT2(3742), ARNT2(3187), POU2F1(947), POU2F1(11991), and SALL2(3096) in different cohorts (90A cohort, 181A cohort) by Kaplan-Meier survival analysis. 3742, 3187, 947, 11991 and 3096 are the Agilent feature number for *ARNT2*, a *ARNT2* variant, *POU2F1*, a *POU2F1* variant and *SALL2*, respectively.

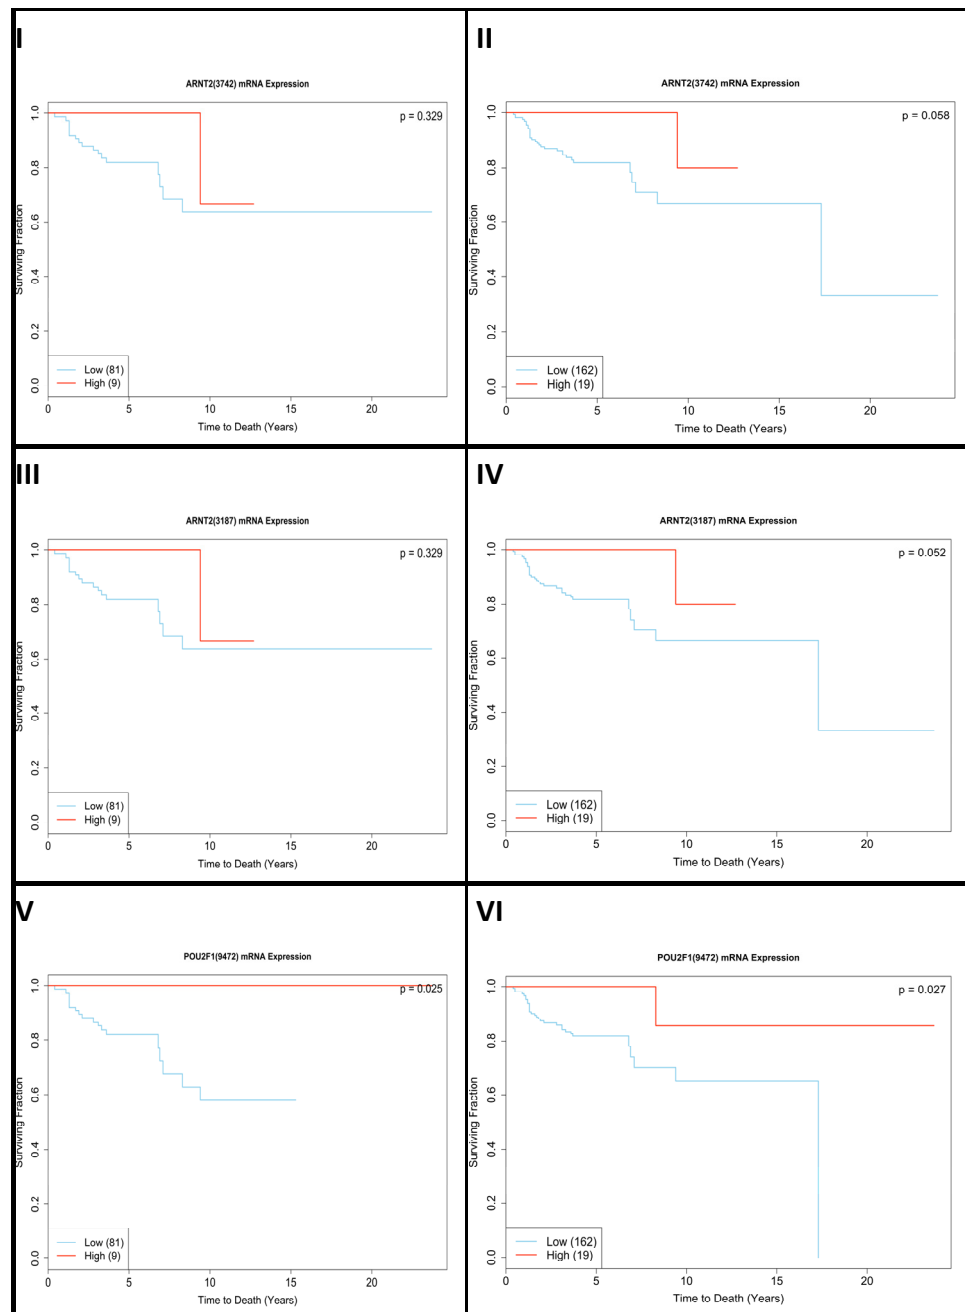

VII

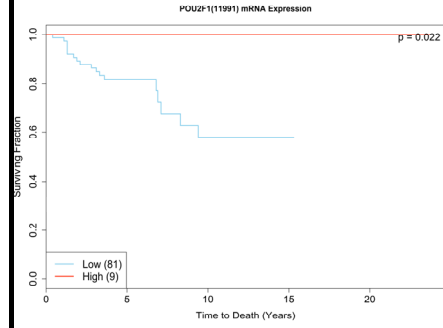

VIII

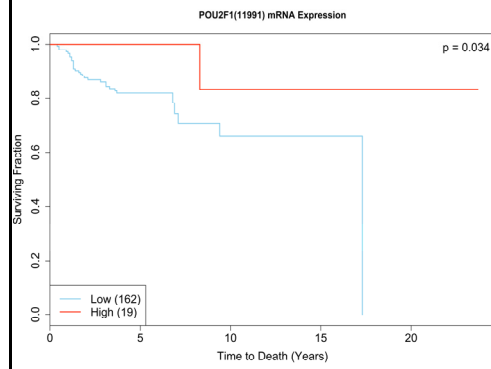

IX

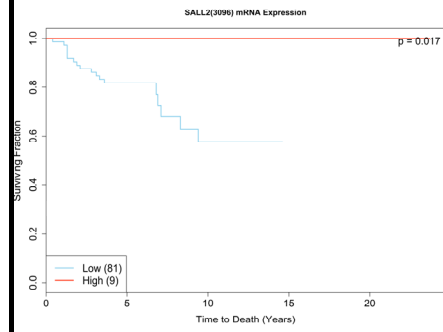

X

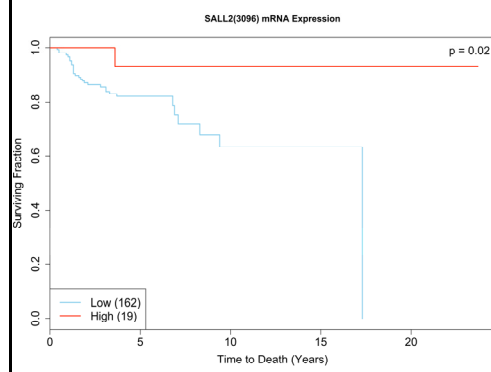

**Table S5.1.** The ANOVA results of 41 gene signature in 90A cohort. The relevant clinicopathological characteristics for MYB and/or ARNT2 are bolded. The p values of ANOVA tests to be less or equal to 0.05 are high-lighted with light blue. The gene symbols with no clinical significance are high-lighted with light yellow.

| FeatureNum | GeneName        | PR   | HER  | stage | LYM  | LVI  | Age  | Grade | TF   | NP   | MC   | Size | LN   | NTn90A |
|------------|-----------------|------|------|-------|------|------|------|-------|------|------|------|------|------|--------|
| 21074      | ABAT            | 0.41 | 0.11 | 0.43  | 0.24 | 0.52 | 0.86 | 0.00  | 0.05 | 0.00 | 0.07 | 0.13 | 0.21 | 0.00   |
| 3069       | ACOT7           | 0.25 | 0.22 | 0.35  | 0.61 | 0.40 | 0.30 | 0.24  | 0.73 | 0.44 | 0.07 | 0.01 | 0.27 | 0.00   |
| 6691       | ANAPC4          | 0.18 | 0.76 | 1.00  | 0.51 | 0.02 | 0.66 | 0.02  | 0.13 | 0.15 | 0.25 | 0.16 | 0.25 | 0.00   |
| 2654       | APOM            | 0.02 | 0.60 | 0.04  | 0.53 | 0.11 | 0.10 | 0.00  | 0.06 | 0.02 | 0.01 | 0.00 | 0.02 | 0.04   |
| 10396      | BC009926        | 0.52 | 0.61 | 0.07  | 0.45 | 0.33 | 0.54 | 0.00  | 0.08 | 0.10 | 0.24 | 0.22 | 0.05 | 0.18   |
| 8570       | CATSPER2        | 0.26 | 0.04 | 0.85  | 0.84 | 0.02 | 0.61 | 0.01  | 0.20 | 0.01 | 0.40 | 0.94 | 0.41 | 0.93   |
| 956        | CCDC124         | 0.15 | 0.13 | 0.85  | 0.25 | 0.10 | 0.98 | 0.47  | 0.75 | 0.63 | 0.35 | 0.05 | 0.36 | 0.01   |
| 1509       | CR621710        | 0.21 | 0.88 | 0.74  | 0.16 | 0.40 | 0.99 | 0.45  | 0.94 | 0.48 | 0.31 | 0.60 | 0.26 | 0.62   |
| 16475      | DUSP7           | 0.96 | 0.27 | 0.92  | 0.22 | 0.07 | 0.76 | 0.05  | 0.39 | 0.24 | 0.02 | 0.52 | 0.15 | 0.01   |
| 17698      | EIF5A           | 0.19 | 0.01 | 0.43  | 0.45 | 0.14 | 0.63 | 0.57  | 0.78 | 0.58 | 0.75 | 0.01 | 0.36 | 0.00   |
| 15762      | ENST00000370040 | 0.69 | 0.16 | 0.11  | 0.48 | 0.01 | 0.58 | 0.00  | 0.02 | 0.01 | 0.34 | 0.32 | 0.09 | 0.03   |
| 20037      | GAPDH           | 0.67 | 0.13 | 0.62  | 0.79 | 0.08 | 0.22 | 0.06  | 0.39 | 0.15 | 0.61 | 0.41 | 0.67 | 0.00   |
| 1039       | GNAI2           | 0.18 | 0.04 | 0.40  | 0.69 | 0.02 | 0.65 | 0.10  | 0.31 | 0.33 | 0.24 | 0.12 | 0.61 | 0.01   |
| 21198      | GNB2            | 0.16 | 0.01 | 0.34  | 0.73 | 0.16 | 0.71 | 0.19  | 0.68 | 0.27 | 0.73 | 0.03 | 0.51 | 0.00   |
| 714        | IQCK            | 0.35 | 0.10 | 0.23  | 0.90 | 0.17 | 0.97 | 0.06  | 0.03 | 0.04 | 0.47 | 0.40 | 0.26 | 0.55   |
| 3891       | MAF1            | 0.23 | 0.06 | 0.60  | 0.58 | 0.05 | 0.86 | 0.18  | 0.79 | 0.17 | 0.63 | 0.04 | 0.50 | 0.02   |
| 5918       | MAP1S           | 0.17 | 0.01 | 0.52  | 0.39 | 0.08 | 0.72 | 0.51  | 0.59 | 0.58 | 0.36 | 0.02 | 0.65 | 0.00   |
| 18840      | NFKBIL2         | 0.05 | 0.01 | 0.42  | 0.34 | 0.16 | 0.33 | 0.40  | 0.94 | 0.15 | 0.89 | 0.01 | 0.24 | 0.00   |
| 20917      | NTN4            | 0.29 | 0.21 | 0.47  | 0.11 | 0.06 | 0.90 | 0.01  | 0.04 | 0.01 | 0.16 | 0.44 | 0.24 | 0.00   |
| 20295      | PAH             | 0.67 | 0.21 | 0.96  | 0.90 | 0.00 | 0.40 | 0.01  | 0.14 | 0.14 | 0.76 | 0.97 | 0.72 | 0.00   |
| 22434      | PCBP3           | 0.51 | 0.58 | 0.55  | 0.19 | 0.37 | 0.97 | 0.65  | 1.00 | 0.23 | 0.07 | 0.51 | 0.25 | 0.69   |
| 17776      | PICK1           | 0.80 | 0.01 | 0.15  | 0.64 | 0.26 | 0.65 | 0.66  | 0.73 | 0.55 | 0.83 | 0.01 | 0.36 | 0.01   |
| 19411      | PKMYT1          | 0.14 | 0.32 | 0.40  | 0.88 | 0.00 | 0.45 | 0.02  | 0.65 | 0.07 | 0.07 | 0.01 | 0.09 | 0.00   |
| 10998      | PMS2CL          | 0.58 | 0.98 | 0.33  | 0.83 | 0.19 | 0.07 | 0.01  | 0.10 | 0.21 | 0.25 | 0.93 | 0.14 | 0.00   |
| 9472       | POU2F1          | 0.29 | 0.05 | 0.54  | 0.82 | 0.01 | 0.25 | 0.37  | 0.24 | 0.54 | 0.13 | 0.05 | 0.16 | 0.39   |
| 11991      | POU2F1          | 0.26 | 0.15 | 0.64  | 0.67 | 0.04 | 0.30 | 0.47  | 0.27 | 0.61 | 0.05 | 0.08 | 0.16 | 0.51   |
| 20014      | PPP1R9A         | 0.72 | 0.24 | 0.46  | 0.98 | 0.01 | 0.04 | 0.12  | 0.42 | 0.26 | 0.19 | 0.16 | 0.35 | 0.99   |
| 4681       | RAB42           | 0.26 | 0.80 | 0.34  | 0.77 | 0.04 | 0.66 | 0.01  | 0.23 | 0.05 | 0.72 | 0.64 | 0.04 | 0.00   |
| 3073       | RANGAP1         | 0.28 | 0.02 | 0.49  | 0.27 | 0.24 | 0.89 | 0.24  | 0.73 | 0.53 | 0.78 | 0.01 | 0.17 | 0.00   |
| 3096       | SALL2           | 0.29 | 0.54 | 0.07  | 0.04 | 0.01 | 0.37 | 0.01  | 0.01 | 0.01 | 0.09 | 0.14 | 0.00 | 0.00   |
| 7939       | SLC25A1         | 0.55 | 0.64 | 0.59  | 0.32 | 0.04 | 0.53 | 0.12  | 0.50 | 0.44 | 0.77 | 0.01 | 0.13 | 0.11   |
| 9673       | STK36           | 0.10 | 0.69 | 0.16  | 0.15 | 0.06 | 0.12 | 0.14  | 0.03 | 0.48 | 0.75 | 0.13 | 0.08 | 0.41   |
| 17750      | TBC1D9          | 0.94 | 0.32 | 0.30  | 0.90 | 0.10 | 0.93 | 0.09  | 0.38 | 0.80 | 0.52 | 0.97 | 0.37 | 0.50   |
| 11119      | TGM2            | 0.31 | 0.00 | 0.91  | 0.89 | 0.08 | 0.93 | 0.10  | 0.50 | 0.03 | 0.95 | 0.44 | 0.96 | 0.00   |
| 10109      | THSD4           | 0.45 | 0.48 | 0.23  | 0.13 | 0.82 | 0.12 | 0.24  | 0.84 | 0.48 | 0.88 | 0.76 | 0.03 | 0.69   |
| 4051       | TMC5            | 0.14 | 0.02 | 0.42  | 0.35 | 0.28 | 0.70 | 0.25  | 0.04 | 0.17 | 0.77 | 0.42 | 0.28 | 0.31   |
| 13619      | TOMM40          | 0.39 | 0.03 | 0.56  | 0.55 | 0.06 | 0.88 | 0.29  | 0.62 | 0.25 | 0.72 | 0.01 | 0.46 | 0.00   |
| 6481       | TTC19           | 0.08 | 0.45 | 0.68  | 0.73 | 0.20 | 0.73 | 0.00  | 0.03 | 0.12 | 0.11 | 0.43 | 0.22 | 0.00   |
| 10024      | XBP1            | 0.98 | 0.09 | 0.10  | 0.84 | 0.03 | 0.58 | 0.01  | 0.62 | 0.00 | 0.82 | 0.11 | 0.45 | 0.01   |
| 7164       | ZNF228          | 0.67 | 0.27 | 0.96  | 0.77 | 0.00 | 0.20 | 0.04  | 0.45 | 0.67 | 0.20 | 0.80 | 0.72 | 0.00   |
| 11969      | ZNF598          | 0.64 | 0.13 | 0.40  | 0.50 | 0.21 | 0.46 | 0.32  | 0.67 | 0.37 | 0.72 | 0.15 | 0.61 | 0.00   |

**Table S5.2.** The ANOVA results of 41 gene signature in 181A cohort. The relevant clinicopathological characteristics for MYB and/or ARNT2 are bolded. The p values of ANOVA tests to be less or equal to 0.05 are high-lighted with light blue. The gene symbols with no clinical significance are high-lighted with light yellow.

| FeatureNum | GeneName        | PR   | HER  | stage | LYM  | LVI  | Age  | Grade | TF   | NP   | MC   | Size | LN   | NTn181A |
|------------|-----------------|------|------|-------|------|------|------|-------|------|------|------|------|------|---------|
| 21074      | ABAT            | 0.00 | 0.50 | 0.57  | 0.08 | 0.26 | 0.15 | 0.00  | 0.00 | 0.00 | 0.00 | 0.75 | 0.29 | 0.02    |
| 3069       | ACOT7           | 0.15 | 0.12 | 0.54  | 0.70 | 0.08 | 0.28 | 0.05  | 0.13 | 0.04 | 0.05 | 0.01 | 0.36 | 0.00    |
| 4259       | ANAPC4          | 0.03 | 0.40 | 0.07  | 0.11 | 0.69 | 0.64 | 0.01  | 0.11 | 0.07 | 0.01 | 0.97 | 0.05 | 0.00    |
| 6691       | ANAPC4          | 0.00 | 0.04 | 0.03  | 0.02 | 0.71 | 0.54 | 0.00  | 0.15 | 0.01 | 0.01 | 0.94 | 0.01 | 0.00    |
| 2654       | APOM            | 0.00 | 0.19 | 0.53  | 0.20 | 0.17 | 0.64 | 0.00  | 0.00 | 0.00 | 0.00 | 0.14 | 0.07 | 0.00    |
| 10396      | BC009926        | 0.00 | 0.02 | 0.75  | 0.08 | 0.15 | 0.41 | 0.00  | 0.00 | 0.00 | 0.00 | 0.69 | 0.31 | 0.23    |
| 8570       | CATSPER2        | 0.00 | 0.38 | 0.63  | 0.26 | 0.79 | 0.17 | 0.00  | 0.00 | 0.00 | 0.00 | 0.83 | 0.41 | 0.11    |
| 956        | CCDC124         | 0.01 | 0.04 | 0.26  | 0.52 | 0.17 | 0.30 | 0.15  | 0.50 | 0.13 | 0.69 | 0.29 | 0.33 | 0.00    |
| 1509       | CR621710        | 0.00 | 0.01 | 0.02  | 0.04 | 0.16 | 0.49 | 0.00  | 0.11 | 0.05 | 0.00 | 0.86 | 0.05 | 0.06    |
| 16475      | DUSP7           | 0.00 | 0.00 | 0.02  | 0.06 | 0.65 | 0.41 | 0.00  | 0.01 | 0.00 | 0.01 | 0.97 | 0.05 | 0.31    |
| 17698      | EIF5A           | 0.02 | 0.00 | 0.59  | 0.20 | 0.53 | 0.80 | 0.19  | 0.94 | 0.22 | 0.55 | 0.26 | 0.42 | 0.00    |
| 15762      | ENST00000370040 | 0.00 | 0.23 | 0.69  | 0.99 | 0.07 | 0.61 | 0.00  | 0.00 | 0.00 | 0.02 | 0.96 | 0.17 | 0.32    |
| 20037      | GAPDH           | 0.25 | 0.01 | 0.31  | 0.12 | 0.80 | 0.72 | 0.01  | 0.21 | 0.01 | 0.21 | 0.86 | 0.18 | 0.00    |
| 1039       | GNAI2           | 0.09 | 0.07 | 0.24  | 0.60 | 0.15 | 0.51 | 0.07  | 0.20 | 0.22 | 0.65 | 0.56 | 0.63 | 0.00    |
| 21198      | GNB2            | 0.02 | 0.00 | 0.15  | 0.28 | 0.40 | 0.65 | 0.06  | 0.36 | 0.06 | 0.37 | 0.33 | 0.37 | 0.00    |
| 714        | IQCK            | 0.01 | 0.00 | 0.25  | 0.04 | 0.34 | 0.65 | 0.00  | 0.01 | 0.00 | 0.00 | 0.32 | 0.31 | 0.07    |
| 3891       | MAF1            | 0.04 | 0.03 | 0.16  | 0.83 | 0.11 | 0.98 | 0.09  | 0.81 | 0.11 | 0.48 | 0.33 | 0.38 | 0.00    |
| 5918       | MAP1S           | 0.02 | 0.01 | 0.20  | 0.57 | 0.08 | 0.59 | 0.25  | 0.71 | 0.12 | 0.91 | 0.11 | 0.44 | 0.00    |
| 18840      | NFKBIL2         | 0.15 | 0.01 | 0.60  | 0.80 | 0.30 | 0.42 | 0.27  | 0.92 | 0.16 | 0.47 | 0.40 | 0.56 | 0.00    |
| 20917      | NTN4            | 0.00 | 0.00 | 0.20  | 0.00 | 0.69 | 0.11 | 0.00  | 0.00 | 0.00 | 0.03 | 0.52 | 0.14 | 0.00    |
| 20295      | PAH             | 0.00 | 0.08 | 0.61  | 0.67 | 0.28 | 0.29 | 0.00  | 0.00 | 0.00 | 0.07 | 0.42 | 0.57 | 0.16    |
| 22434      | PCBP3           | 0.07 | 0.30 | 0.10  | 0.01 | 0.07 | 0.40 | 0.11  | 0.63 | 0.10 | 0.16 | 0.51 | 0.07 | 0.65    |
| 17776      | PICK1           | 0.32 | 0.04 | 0.97  | 0.53 | 1.00 | 0.36 | 0.51  | 0.85 | 0.33 | 0.65 | 0.37 | 0.82 | 0.00    |
| 19411      | PKMYT1          | 0.01 | 0.01 | 0.58  | 0.74 | 0.25 | 0.76 | 0.00  | 0.17 | 0.00 | 0.00 | 0.06 | 0.32 | 0.00    |
| 10998      | PMS2CL          | 0.01 | 0.19 | 0.19  | 0.01 | 0.05 | 0.56 | 0.00  | 0.03 | 0.01 | 0.02 | 0.78 | 0.08 | 0.00    |
| 9472       | POU2F1          | 0.00 | 0.01 | 0.54  | 0.15 | 0.79 | 0.39 | 0.05  | 0.29 | 0.06 | 0.06 | 0.26 | 0.24 | 0.96    |
| 11991      | POU2F1          | 0.00 | 0.07 | 0.57  | 0.23 | 0.83 | 0.36 | 0.09  | 0.46 | 0.13 | 0.04 | 0.19 | 0.30 | 0.92    |
| 20014      | PPP1R9A         | 0.33 | 0.09 | 0.97  | 0.37 | 0.31 | 0.38 | 0.24  | 0.30 | 0.36 | 0.19 | 0.21 | 0.75 | 0.91    |
| 4681       | RAB42           | 0.00 | 0.03 | 0.79  | 0.12 | 0.74 | 0.44 | 0.00  | 0.02 | 0.00 | 0.20 | 0.82 | 0.08 | 0.00    |
| 3073       | RANGAP1         | 0.02 | 0.04 | 0.11  | 0.41 | 0.31 | 0.42 | 0.11  | 0.73 | 0.30 | 0.24 | 0.10 | 0.08 | 0.00    |
| 3096       | SALL2           | 0.00 | 0.28 | 0.09  | 0.89 | 0.74 | 0.15 | 0.00  | 0.00 | 0.00 | 0.00 | 0.04 | 0.50 | 0.00    |
| 7939       | SLC25A1         | 0.24 | 0.90 | 0.61  | 0.40 | 0.16 | 0.93 | 0.08  | 0.14 | 0.38 | 0.46 | 0.10 | 0.12 | 0.03    |
| 9673       | STK36           | 0.00 | 0.18 | 0.29  | 0.58 | 0.65 | 0.75 | 0.00  | 0.00 | 0.00 | 0.00 | 0.08 | 0.77 | 0.10    |
| 17750      | TBC1D9          | 0.00 | 0.20 | 0.27  | 0.15 | 0.58 | 0.16 | 0.00  | 0.02 | 0.01 | 0.00 | 0.83 | 0.30 | 0.00    |
| 11119      | TGM2            | 0.09 | 0.00 | 0.59  | 0.44 | 0.23 | 0.27 | 0.08  | 0.42 | 0.02 | 0.84 | 0.92 | 0.63 | 0.00    |
| 10109      | THSD4           | 0.30 | 0.32 | 0.21  | 0.40 | 0.65 | 0.04 | 0.07  | 0.73 | 0.43 | 0.18 | 0.21 | 0.16 | 0.48    |
| 4051       | TMC5            | 0.01 | 0.00 | 0.57  | 0.04 | 0.06 | 0.94 | 0.01  | 0.04 | 0.04 | 0.04 | 0.85 | 0.88 | 0.91    |
| 13619      | TOMM40          | 0.12 | 0.00 | 0.35  | 0.35 | 0.37 | 0.92 | 0.09  | 0.54 | 0.08 | 0.21 | 0.25 | 0.43 | 0.00    |
| 6481       | TTC19           | 0.00 | 0.10 | 0.50  | 0.24 | 0.98 | 0.23 | 0.00  | 0.00 | 0.00 | 0.04 | 0.21 | 0.39 | 0.00    |
| 10024      | XBP1            | 0.00 | 0.72 | 0.51  | 0.03 | 0.99 | 0.43 | 0.00  | 0.03 | 0.00 | 0.00 | 0.63 | 0.06 | 0.71    |
| 7164       | ZNF228          | 0.16 | 0.58 | 0.09  | 0.27 | 0.15 | 0.10 | 0.01  | 0.39 | 0.02 | 0.26 | 0.60 | 0.31 | 0.00    |
| 11969      | ZNF598          | 0.36 | 0.01 | 0.07  | 0.75 | 0.86 | 0.64 | 0.08  | 0.99 | 0.02 | 0.29 | 0.34 | 0.11 | 0.00    |

**Table S5.3.** Clinicopathological characteristics of four subcohorts of infiltrating ductal breast carcinomas.

|                                  | N= 15       | N= 8        | N= 16       | N= 35       |
|----------------------------------|-------------|-------------|-------------|-------------|
| Characteristic                   | Subcohort A | Subcohort B | Subcohort C | Subcohort D |
| Grade 1                          | 8           | 0           | 8           | 1           |
| Grade 2                          | 7           | 3           | 8           | 12          |
| Grade 3                          | 0           | 4           | 0           | 20          |
| NA                               | 0           | 1           | 0           | 2           |
|                                  |             |             |             |             |
| Tubule formation 1               | 1           | 0           | 1           | 0           |
| Tubule formation 2               | 9           | 1           | 9           | 2           |
| Tubule formation 3               | 5           | 4           | 6           | 26          |
| NA                               | 0           | 3           | 0           | 7           |
|                                  |             |             |             |             |
| Nuclear pleomorphism 1           | 2           | 0           | 2           | 1           |
| Nuclear pleomorphism 2           | 12          | 0           | 13          | 6           |
| Nuclear pleomorphism 3           | 1           | 5           | 1           | 21          |
| NA                               | 0           | 3           | 0           | 7           |
|                                  |             |             |             |             |
| Mitotic count 1                  | 10          | 2           | 11          | 7           |
| Mitotic count 2                  | 5           | 1           | 5           | 13          |
| Mitotic count 3                  | 0           | 2           | 0           | 8           |
| NA                               | 0           | 3           | 0           | 7           |
|                                  |             |             |             |             |
| Lymphovascular invasion negative | 7           | 0           | 7           | 12          |
| Lymphovascular invasion positive | 7           | 8           | 8           | 20          |
| NA                               | 1           | 0           | 1           | 3           |
|                                  |             |             |             |             |
| No. of lymph node metastasis 0   | 5           | 0           | 6           | 15          |
| No. of lymph node metastasis 1   | 8           | 2           | 8           | 11          |
| No. of lymph node metastasis 2   | 2           | 0           | 2           | 0           |
| No. of lymph node metastasis 3   | 0           | 5           | 0           | 6           |
| NA                               | 0           | 1           | 0           | 3           |
|                                  |             |             |             |             |
| lymph node metastasis negative   | 5           | 1           | 6           | 16          |
| lymph node metastasis positive   | 10          | 6           | 10          | 17          |
| NA                               | 0           | 1           | 0           | 2           |
|                                  |             |             |             |             |
| Tumor size 1                     | 8           | 1           | 9           | 9           |
| Tumor size 2                     | 7           | 2           | 7           | 18          |
| Tumor size 3                     | 0           | 4           | 0           | 5           |
| Tumor size 4                     | 0           | 1           | 0           | 3           |
|                                  |             |             |             |             |
| stage I                          | 3           | 0           | 4           | 7           |
| stage II                         | 10          | 1           | 10          | 16          |
| stage III                        | 2           | 6           | 2           | 10          |
| stage IV                         | 0           | 0           | 0           | 1           |
| NA                               | 0           | 1           | 0           | 1           |

**Table S5.4.** Univariate and multivariate analyses for survival on prognostic factors in 90A and 181A cohorts, respectively. The p values of tests in the Cox proportional hazard model to be less or equal to 0.05 are highlighted with light blue.

| Prognostic factor                    | 90A                 |         |                       |         |                       |         | 181A                |         |                       |         |                       |         |
|--------------------------------------|---------------------|---------|-----------------------|---------|-----------------------|---------|---------------------|---------|-----------------------|---------|-----------------------|---------|
|                                      | Univariate Analysis |         | Multivariate Analysis |         | Multivariate Analysis |         | Univariate Analysis |         | Multivariate Analysis |         | Multivariate Analysis |         |
|                                      | Hazard Ratio        | P value | Hazard Ratio          | P value | Hazard Ratio          | P value | Hazard Ratio        | P value | Hazard Ratio          | P value | Hazard Ratio          | P value |
| Grade1 vs. 2&3                       | 1.92                | 0.32    | 0.38                  | 1.00    | 0.42                  | 0.37    | 2.00                | 0.27    | 0.00                  | 1.00    | 0.35                  | 0.24    |
| LVInegative vs. positive             | 3.30                | 0.13    | 0.00                  | 1.00    | 2.50                  | 0.44    | 4.34                | 0.02    | 3.31                  | 1.00    | 2.95                  | 0.17    |
| Size 1 vs. 2&3 &4                    | 1.76                | 0.38    | 0.15                  | 1.00    | 0.57                  | 0.51    | 2.97                | 0.04    | 26425064.00           | 1.00    | 0.55                  | 0.37    |
| NP 1 vs. 2&3                         | 80907453.00         | 1.00    | 0.04                  | 1.00    | 92700250.00           | 1.00    | 28131056.00         | 1.00    | 2.10E+14              | 1.00    | 324566238.00          | 1.00    |
| TF 1 vs. 2&3                         | 25794474.00         | 1.00    | 6.93                  | 1.00    | 0.00                  | 1.00    | 25962461.00         | 1.00    | 27767548.00           | 1.00    | 0.00                  | 1.00    |
| LNM 1 vs. 2&3                        | 6.82                | 0.06    | 0.22                  | 1.00    | 2052168000.00         | 1.00    | 5.64                | 0.00    | 168272720.00          | 1.00    | 20.33                 | 0.04    |
| MC 1 vs.2&3                          | 1.39                | 0.59    | 4137473794.00         | 1.00    | 0.80                  | 0.77    | 1.77                | 0.22    | 4137473794.00         | 1.00    | 1.31                  | 0.65    |
| Stage 1vs, 2&3&4                     | 2.32                | 0.42    | 16.37                 | 1.00    | 2.41                  | 1.00    | 7.49                | 0.05    | 0.00                  | 1.00    | 286595629.00          | 1.00    |
| LYM positive vs. negative            | 6.49                | 0.07    | 0.71                  | 0.81    | 0.10                  | 0.06    | 3.99                | 0.01    | 0.15                  | 0.19    | 0.16                  | 0.09    |
| 41 gene signature (subcohort A/B)    | 2659960467.00       | 1.00    | 43333711704.00        | 1.00    | -                     | -       | -                   | -       | -                     | -       | -                     | -       |
| 41 gene signature (subcohort A/nonA) | 277575040.00        | 1.00    | -                     | -       | 302767300.00          | 1.00    | -                   | -       | -                     | -       | -                     | -       |
| 41 gene signature (subcohort C/D)    | -                   | -       | -                     | -       | -                     | -       | 349540283.00        | 1.00    | 11024502.00           | 1.00    | -                     | -       |
| 41 gene signature (subcohort C/nonC) | -                   | -       | -                     | -       | -                     | -       | 93278022.00         | 1.00    | -                     | -       | 722655769.00          | 1.00    |

**Figure S6.1.** Heatmaps for the common gene pool in both cell cycle signal transduction pathway and the network of *MYB\_ARNT2* in 90A cohort.

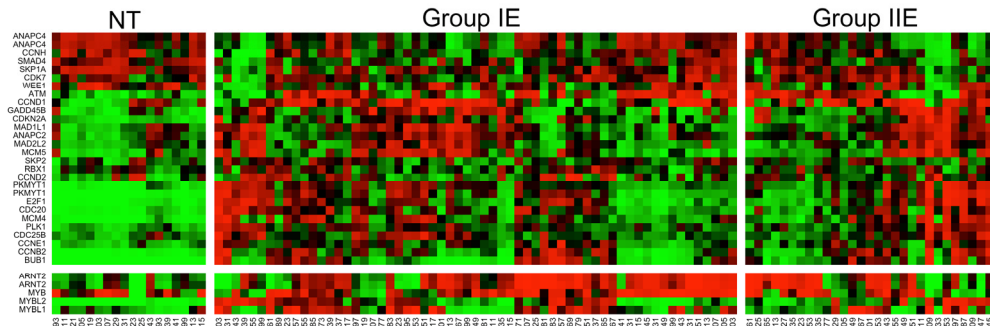

**Figure S6.2.** Heatmaps for the common gene pool in both VEGF signal transduction pathway and the network of *MYB\_ARNT2* in 90A cohort.

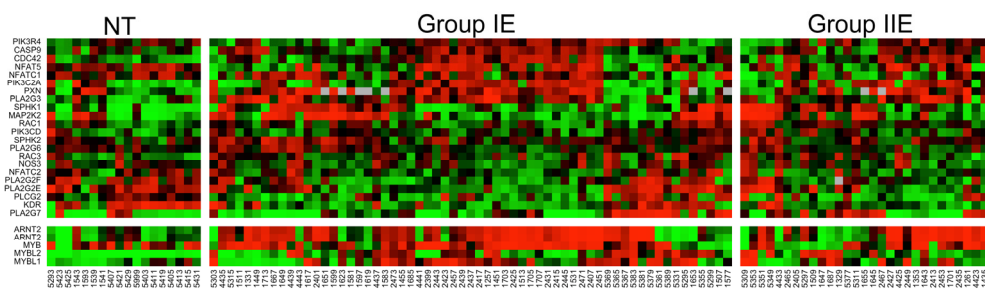

**Figure S6.3.** Heatmaps for the common gene pool in both p53 signal transduction pathway and the network of *MYB\_ARNT2* in 90A cohort.

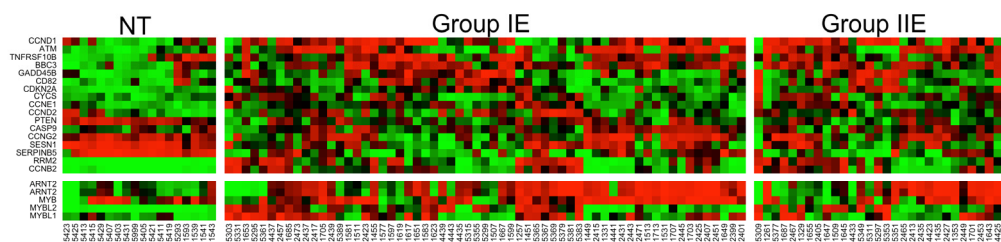

**Figure S6.4.** Heatmaps for the common gene pool in both ribosome signal transduction pathway and the network of *MYB\_ARNT2* in 90A cohort. Grey color within the heatmap stands for data not available after data processing. In this case, we do not use this piece of information for further discussion due to most data not available.



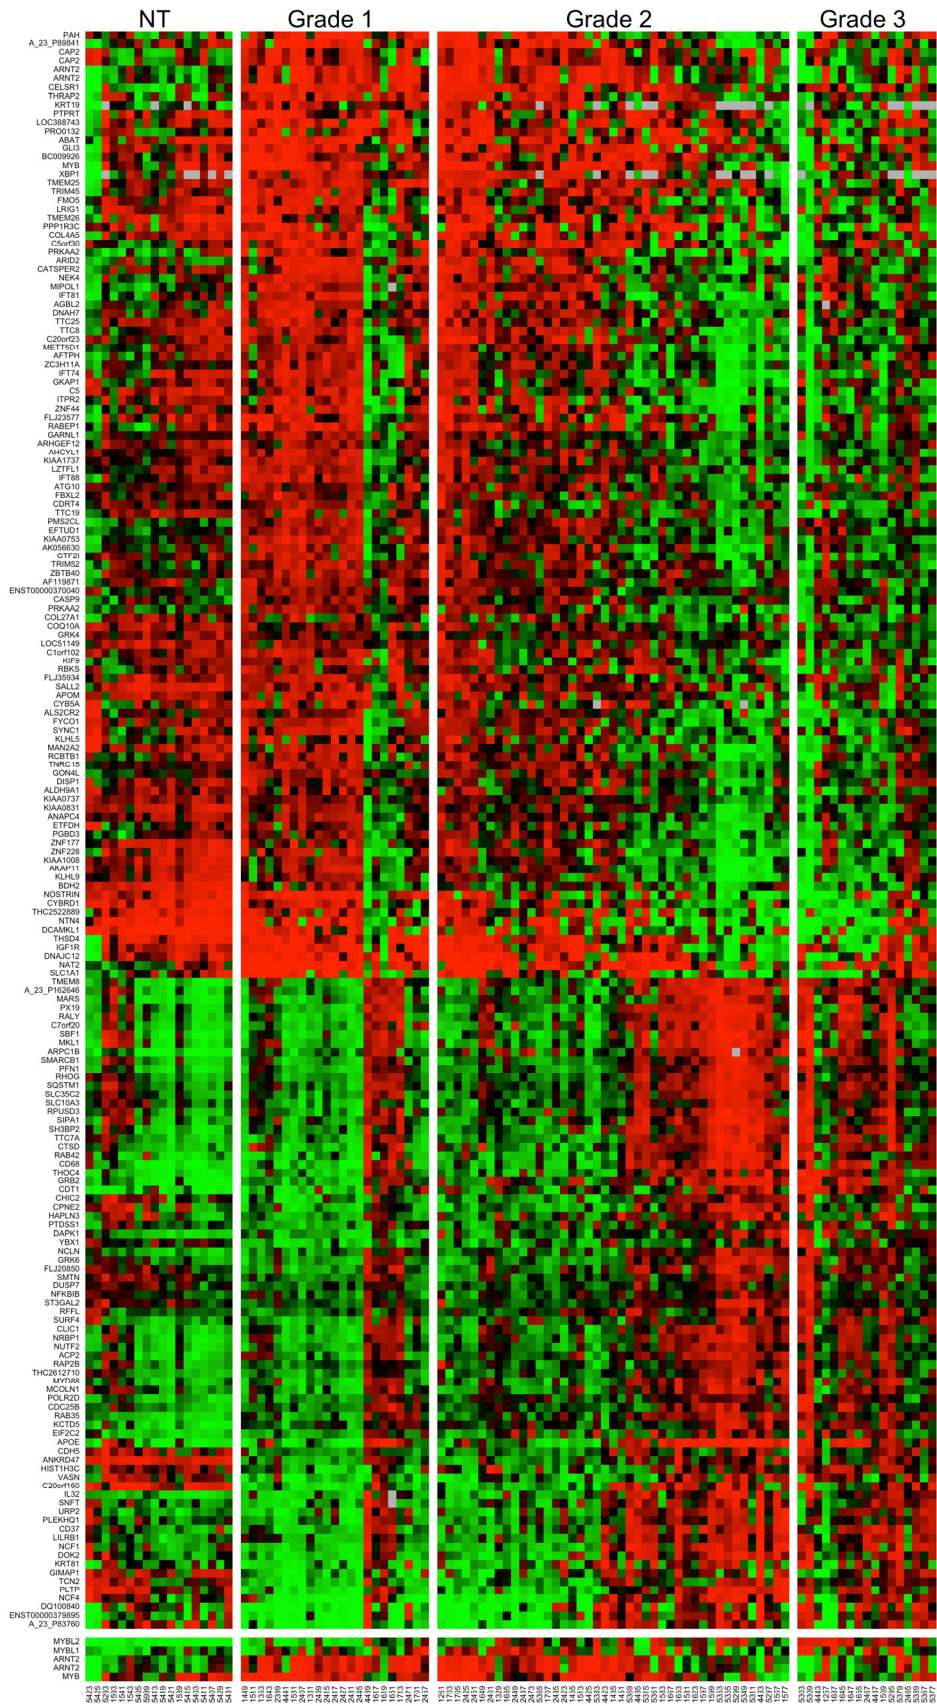

**Figure S6.8.** Heatmaps for the common gene pool significant for both lymphovascular invasion (LVI) and the network of *MYB\_ARNT2* in 90A cohort.

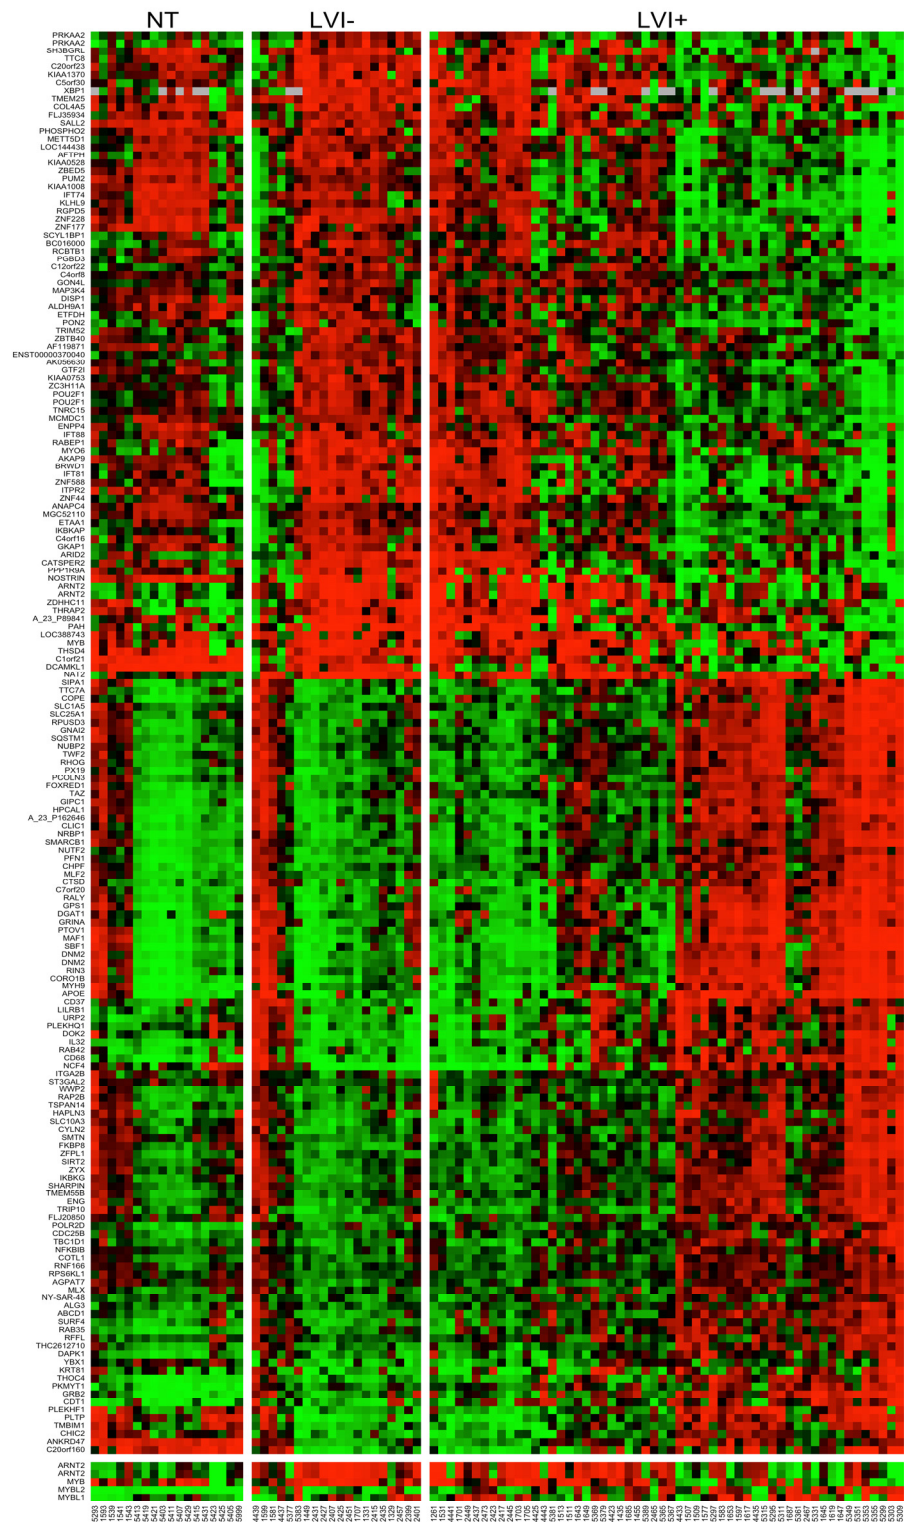

**Figure S6.9.** Heatmaps for the common gene pool significant for both tumor size (size) and the network of *MYB\_ARNT2* in 90A cohort.

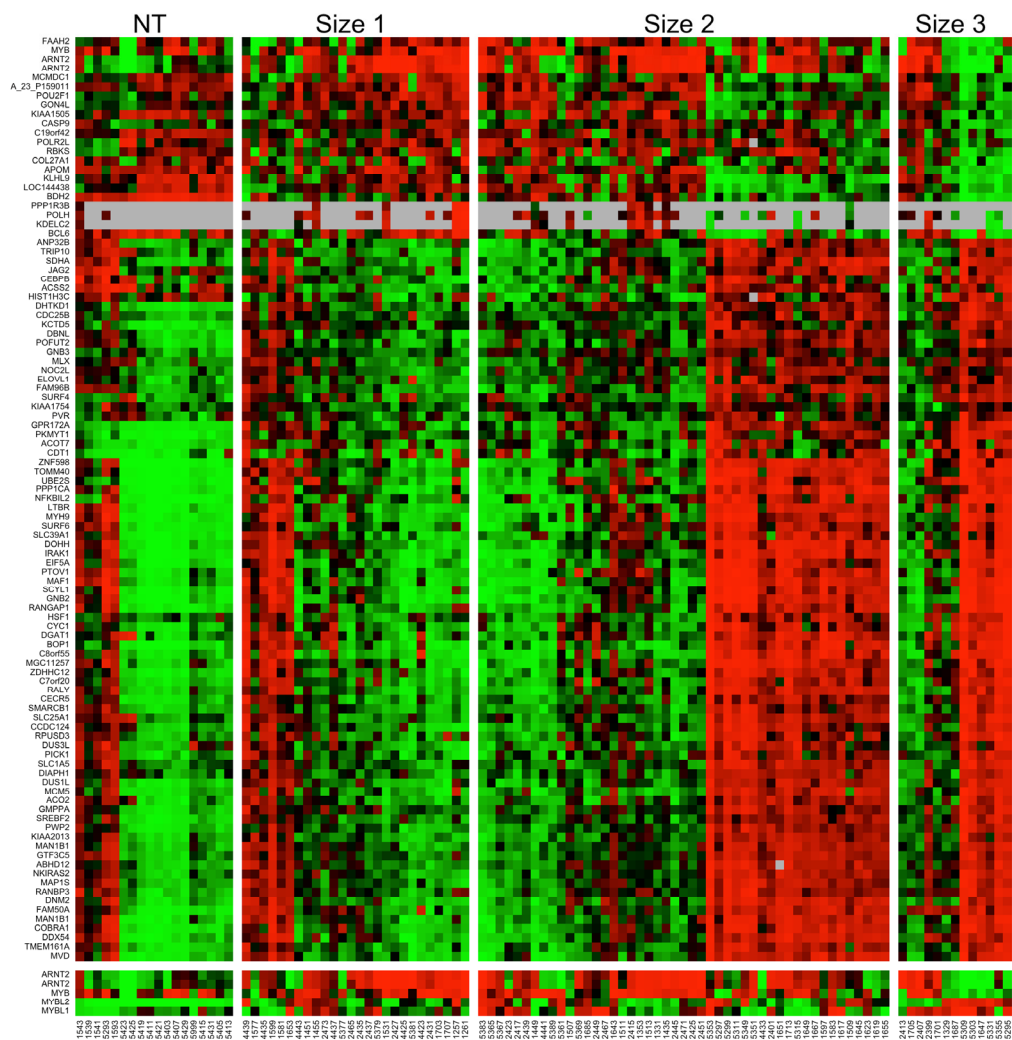

**Figure S6.10.** The most relevant subnetworks of *MYB*, *ARNT2* and *SALL2* for epithelial-to-mesenchymal transition (EMT) activities in 90A cohort.

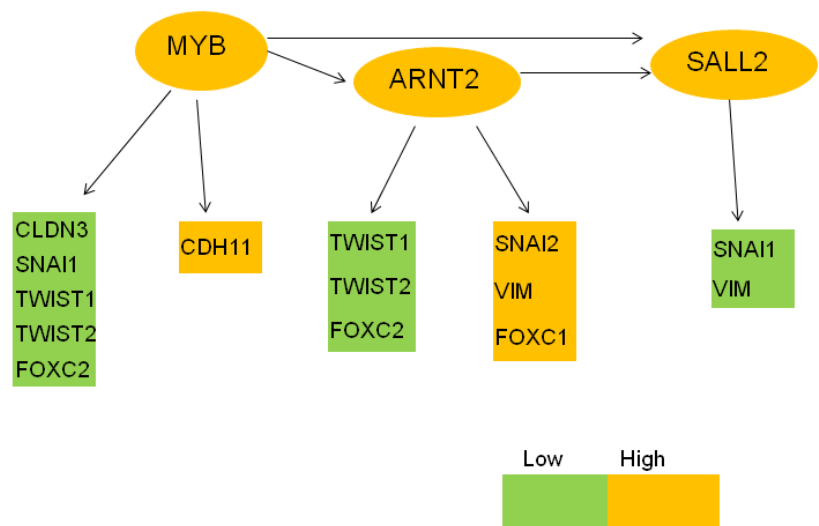

**Table S6.1.** . Partial results of the supervised network analysis in Tables S1.3 and S1.4 show *MYB* and *ARNT2* shared target genes (57 genes) overlapping with the downstream target genes of ARNT2/SIM1. Liu C *et al.*(2003) [ 21 ] reported that ARNT2 dimerizes with SIM1 to up-regulate their downstream target genes (268 probes) *in vitro*, which are predicted to be functional in seven categories - transcription regulators, signaling components, metabolic enzymes, channels and transporters, cell adhesion and migration, miscellaneous and uncharacterized.

| Cohorts                 | The putative target genes of <i>MYB</i> and <i>ARNT2</i> validated to be downstream target genes of ARNT2/ SIM1 [ 21 ]                                                          |
|-------------------------|---------------------------------------------------------------------------------------------------------------------------------------------------------------------------------|
| Groups IE and IIE       | NACA,HGFAC, GALNT4, GRIN1, SERPINA5, FNBP1L, SPRR1A, COL12A1, CDH3, LRRFIP1, FHIT, EIF5A, PFN1, BAT3, TERF1,TNFRSF9, CAMLG, SYT5, MRPL2, AKT1, CD86.                            |
| Group IE less Group IIE | AHR, CBFB, EYA1, SOX10, MDM4, TCF3, NR5A1, FOXH1, ARNT2, WNT7B, SMAD3, MTPN, TYROBP, TNF, EGFR,GPX3, OAZ1, CALB2, ADAM28, LCAT, LGALS9, CD86, CD52, GUCY2C, CRYGD, POLD1, APOE. |
| Group IIE less Group IE | HOMER1, LIFR, CCR1, GSTA3, KLK9, APOA5, SP100, NMBR, SIM1.                                                                                                                      |

**Figure S7.1.** Mean plot analyses of mRNA levels for *POU2F1*(9472) in eight clinical categories and in three cohorts of infiltrating ductal carcinoma (IDCs), respectively. Lymphovascular invasion (LVI), nodal category (lymph node metastasis (LYM), number of nodal metastasis(LNM)), histological grade (Grade) category (nuclear pleomorphism (NP) and tubule formation (TF)) and stage were analyzed. Cohort 1 (90A) has Groups IE and IIE. Cohort 2 (91A) has ER(-) subtypes (see main text for definitions). Cohort 3(181A) has cohorts 1 and 2.

## Cohort 1

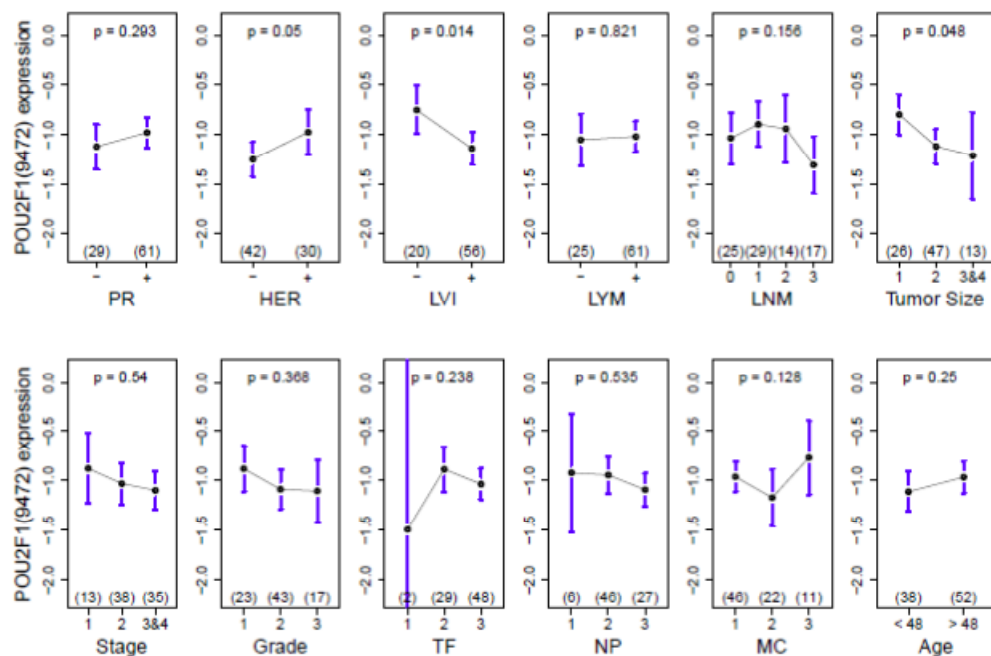

## B. Cohort 2.

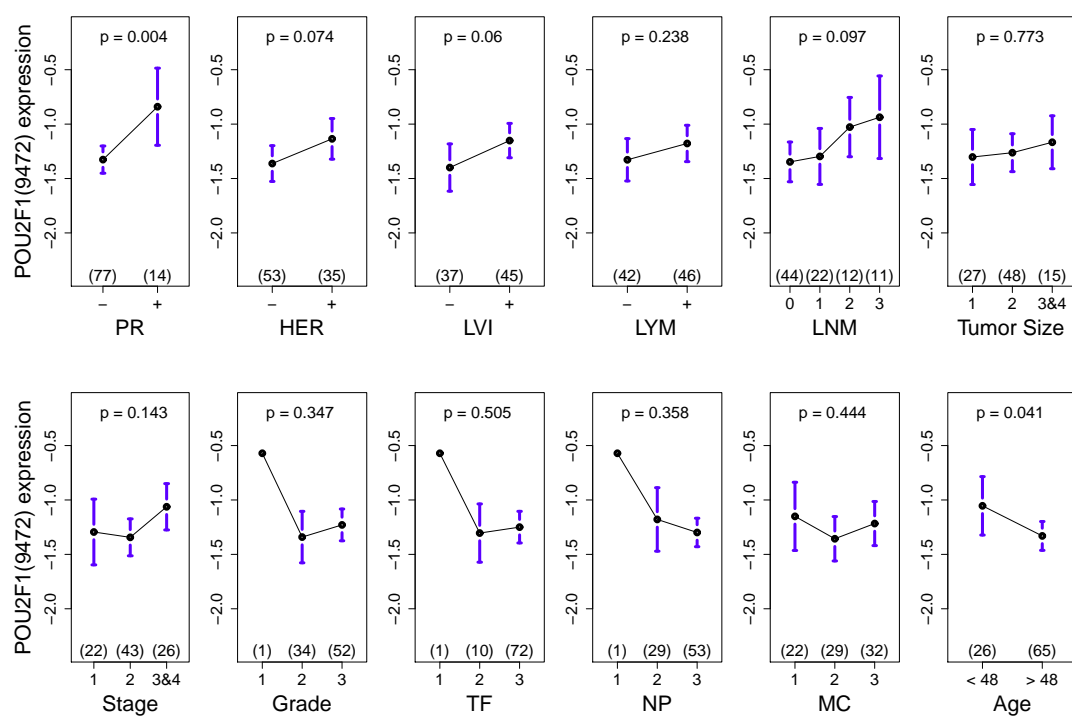

## C. Cohort 3.

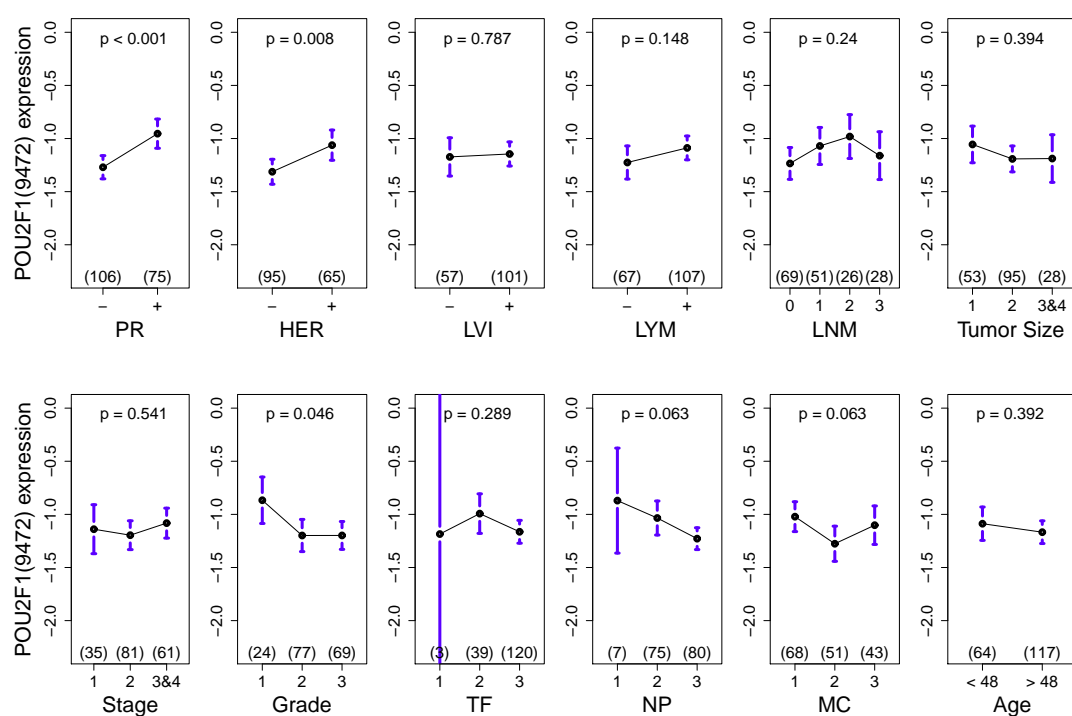

**Figure S7.2.** Mean plot analyses of mRNA levels for *POU2F1* (11991) in eight clinical categories and in three cohorts of infiltrating ductal carcinoma (IDCs), respectively. Lymphovascular invasion (LVI), nodal category (lymph node metastasis (LYM), number of nodal metastasis (LNM)), histological grade (Grade) category (nuclear pleomorphism (NP) and tubule formation (TF)) and stage were analyzed. Cohort 1 (90A) has Groups IE and IIE. Cohort 2 (91A) has ER(−) subtypes (see main text for definitions). Cohort 3 (181A) has cohorts 1 and 2.

A. Cohort 1.

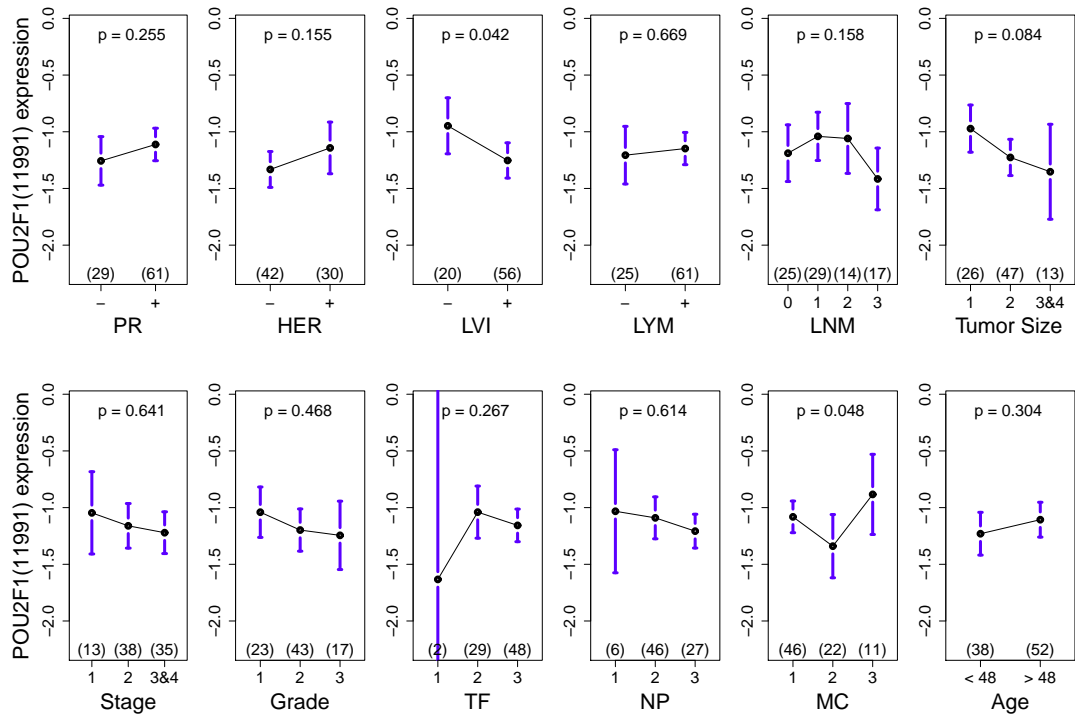

## B. Cohort 2.

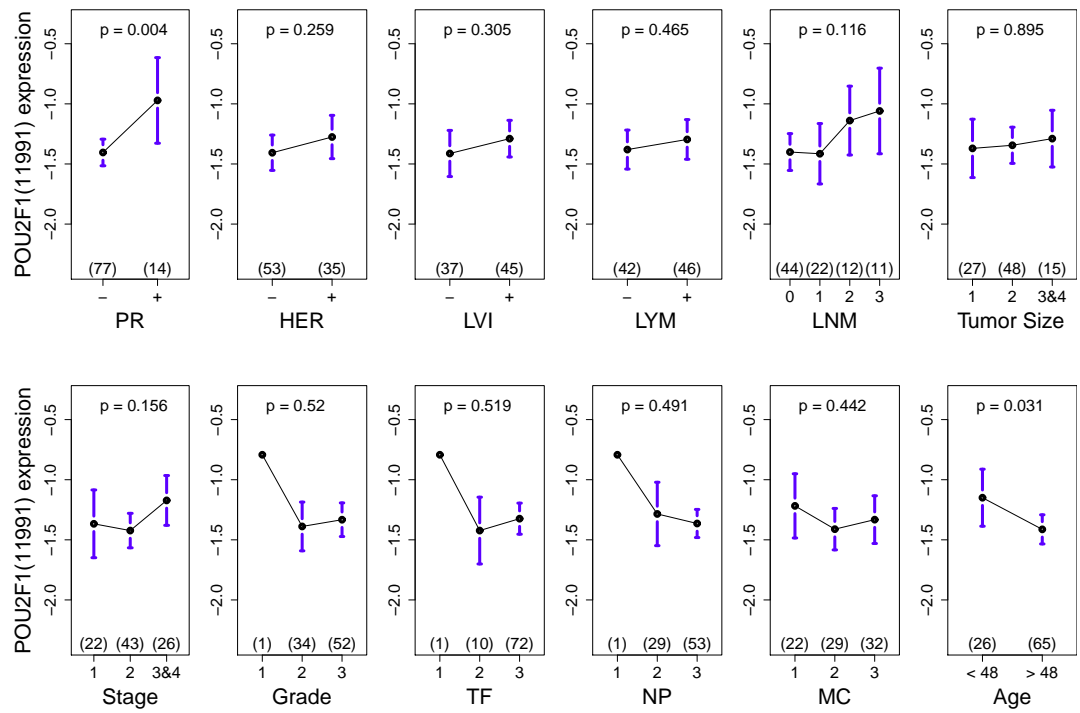

## C. Cohort 3.

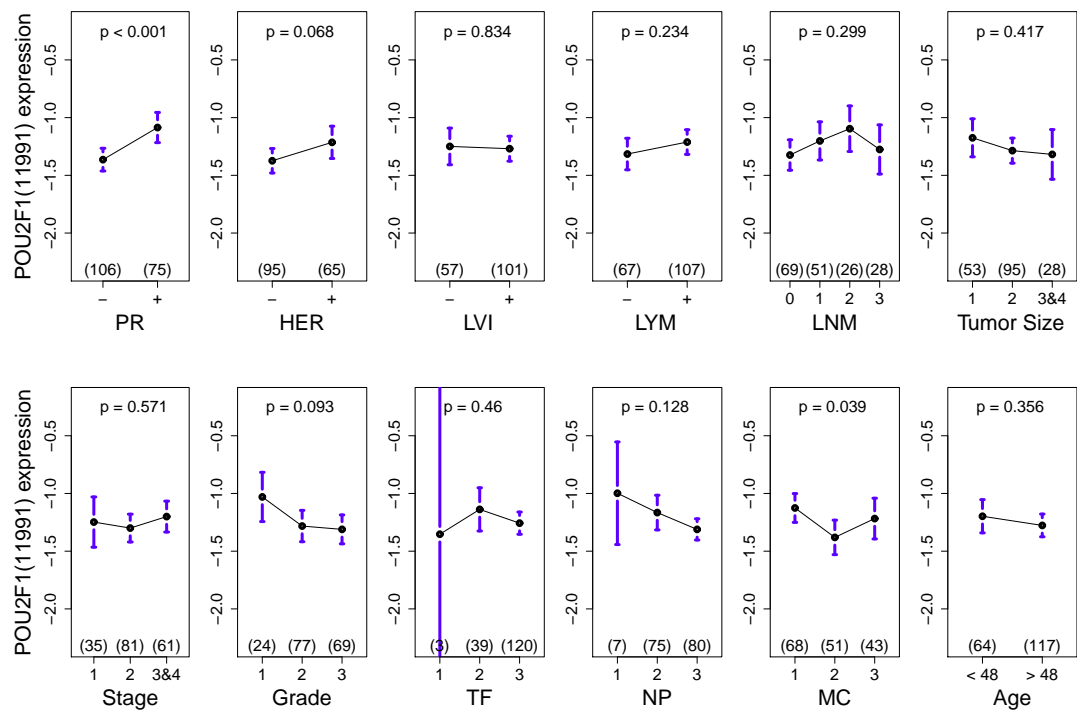

**Figure S7.3.** Mean plot analyses of mRNA levels for *SALL2* (3096) in eight clinical categories and in three cohorts of infiltrating ductal carcinoma (IDCs), respectively. Lymphovascular invasion (LVI), nodal category (lymph node metastasis (LYM), number of nodal metastasis (LNM)), histological grade (Grade) category (nuclear pleomorphism (NP) and tubule formation (TF)) and stage were analyzed. Cohort 1 (90A) has Groups IE and IIE. Cohort 2 (91A) has ER(−) subtypes (see main text for definitions). Cohort 3 (181A) has cohorts 1 and 2.

A. Cohort 1.

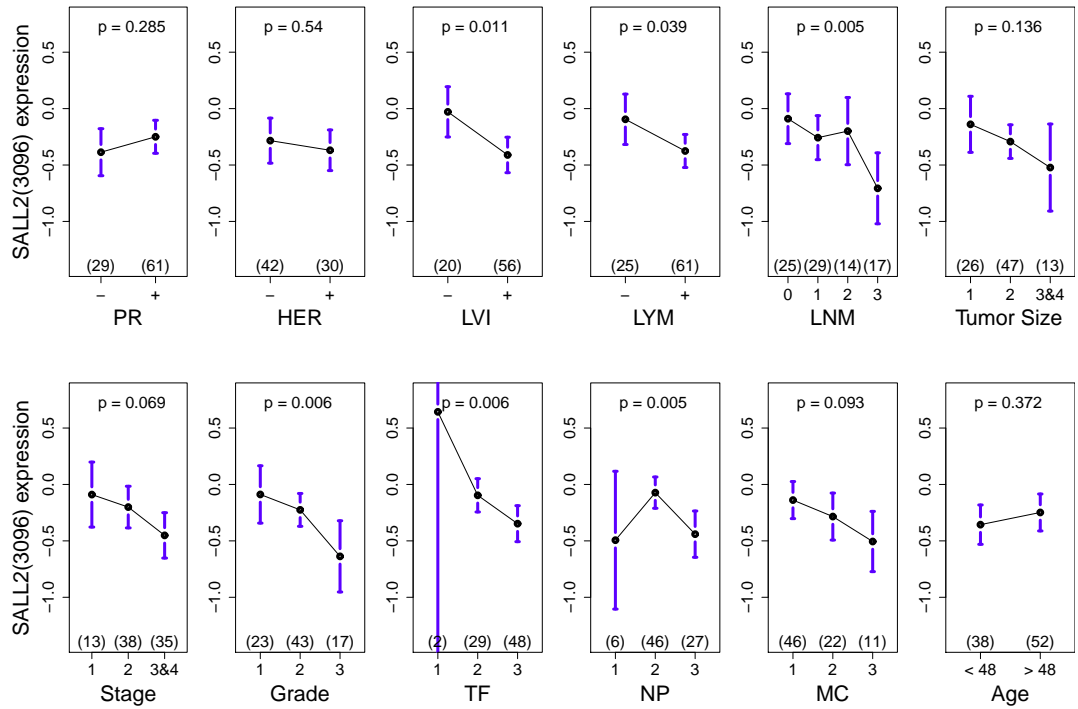

## B. Cohort 2.

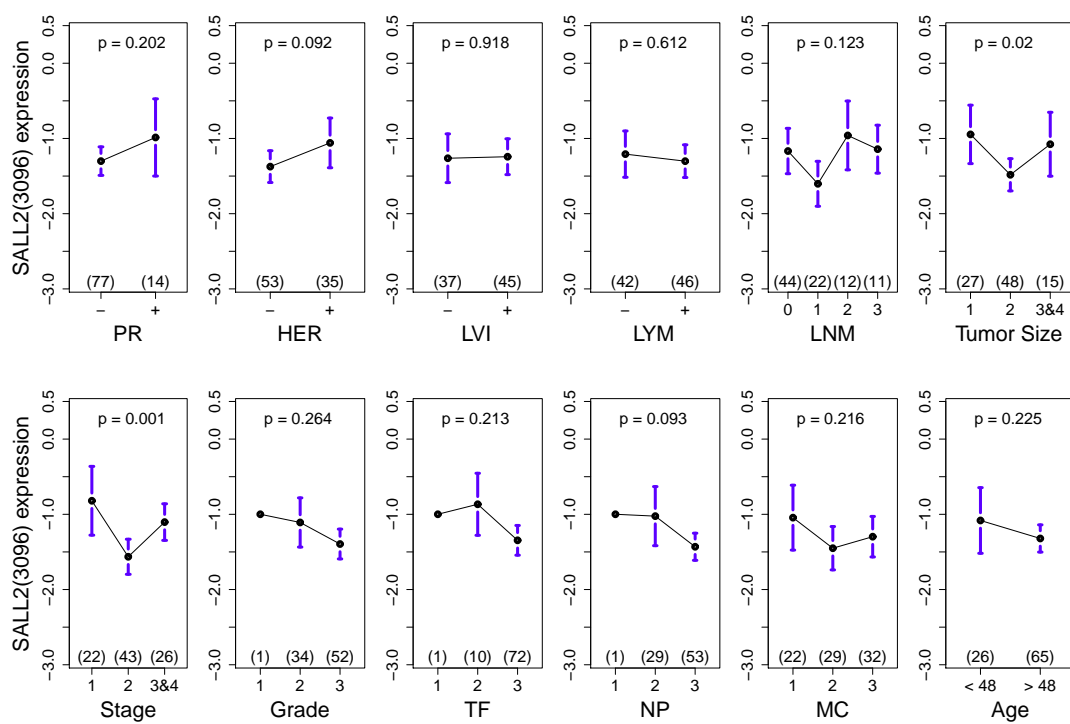

## C. Cohort 3.

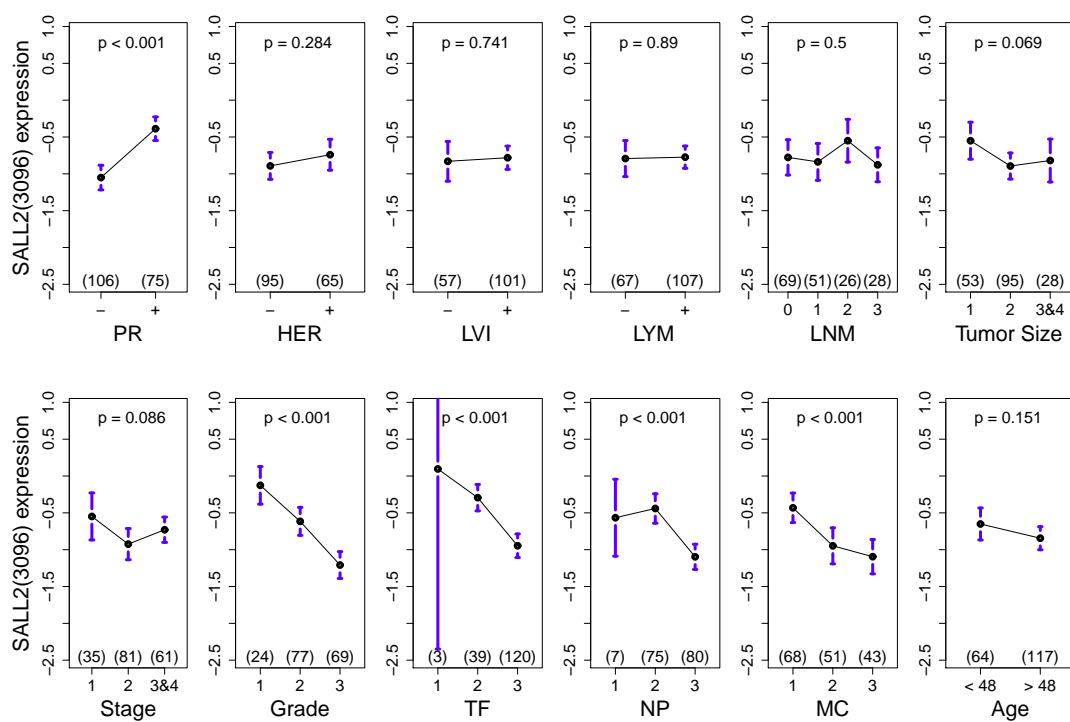

**Figure S7.4.** Mean plot analyses of mRNA levels for *XPB1* (10024) in eight clinical categories and in three cohorts of infiltrating ductal carcinoma (IDCs), respectively. Lymphovascular invasion (LVI), nodal category (lymph node metastasis (LYM), number of nodal metastasis (LNM)), histological grade (Grade) category (nuclear pleomorphism (NP) and tubule formation (TF)) and stage were analyzed. Cohort 1 (90A) has Groups IE and IIE. Cohort 2 (91A) has ER(−) subtypes (see main text for definitions). Cohort 3 (181A) has cohorts 1 and 2.

A. Cohort 1.

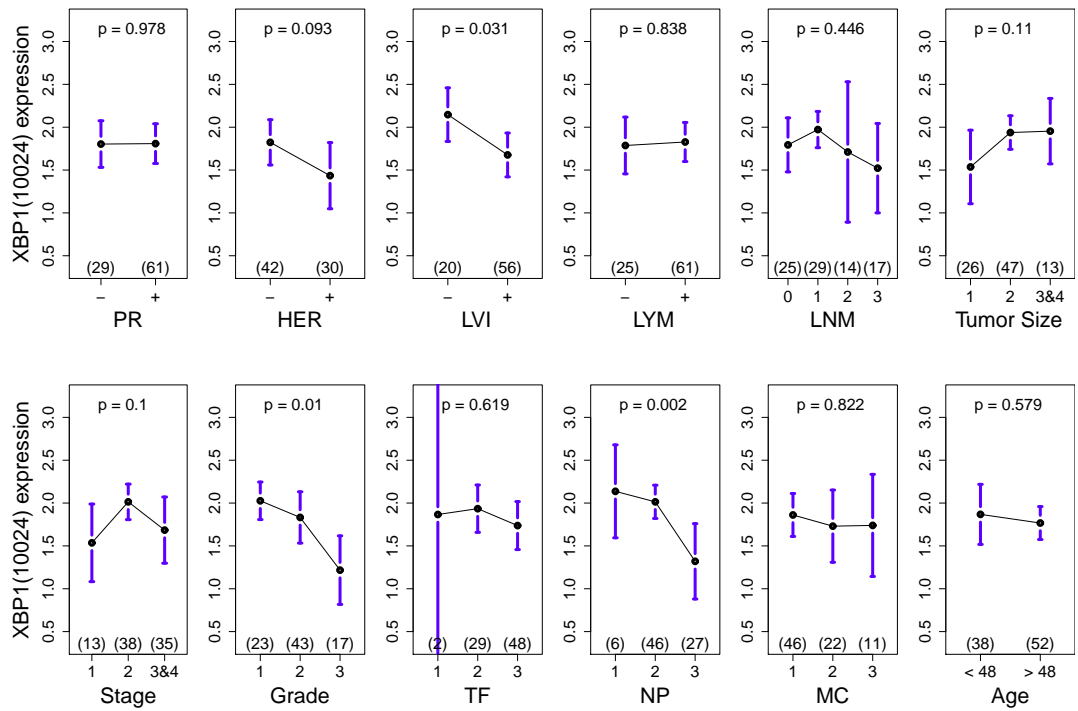

## B. Cohort 2.

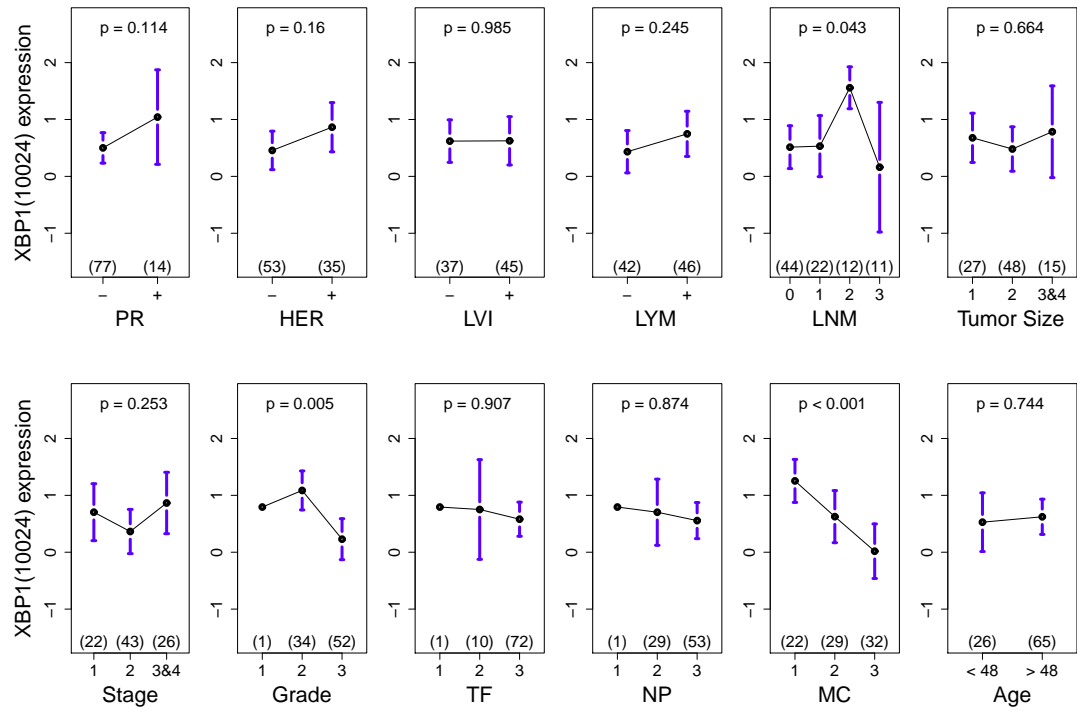

## C. Cohort 3.

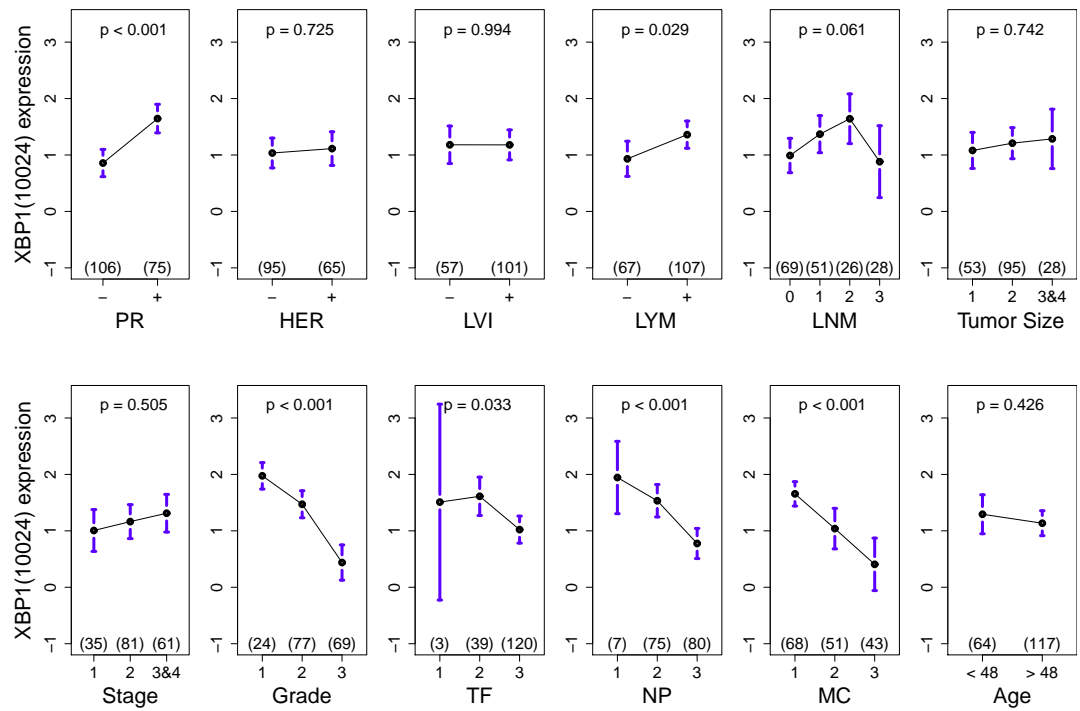

**Figure S7.5.** Mean plot analyses of mRNA levels for *MYBL1* (C11830) in eight clinical categories and in three cohorts of infiltrating ductal carcinoma (IDCs), respectively. Lymphovascular invasion (LVI), nodal category (lymph node metastasis (LYM), number of nodal metastasis (LNM)), histological grade (Grade) category (nuclear pleomorphism (NP) and tubule formation (TF)) and stage were analyzed. Cohort 1 (90A) has Groups IE and IIE. Cohort 2 (91A) has ER(−) subtypes (see main text for definitions). Cohort 3 (181A) has cohorts 1 and 2.

A. Cohort 1.

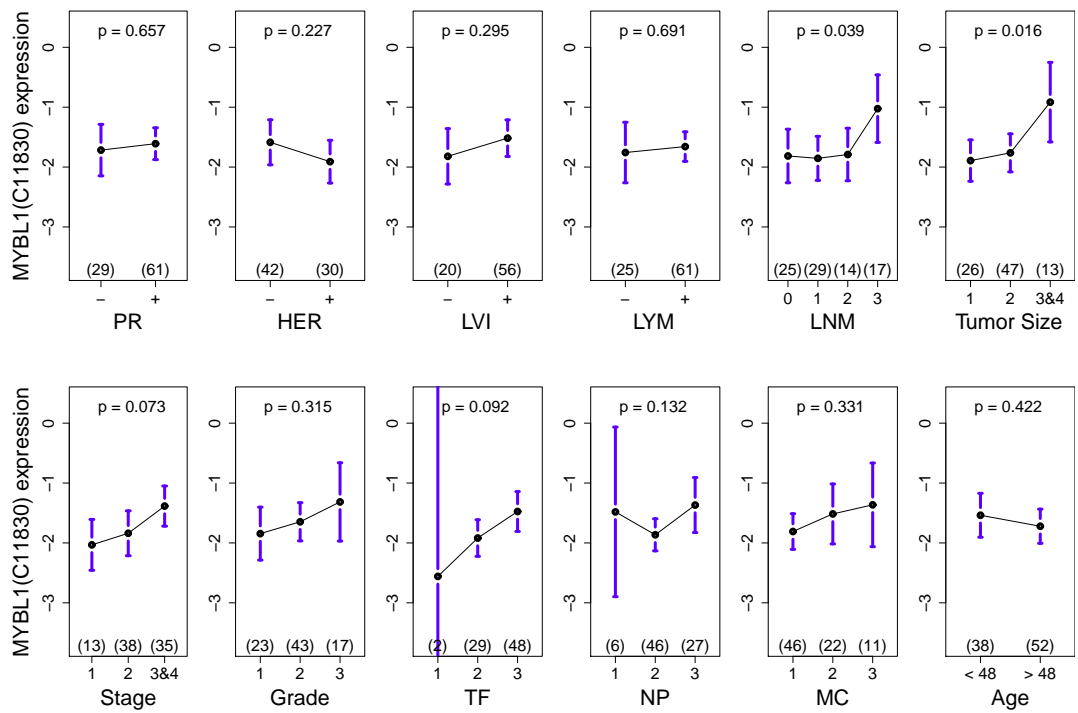

## B. Cohort 2.

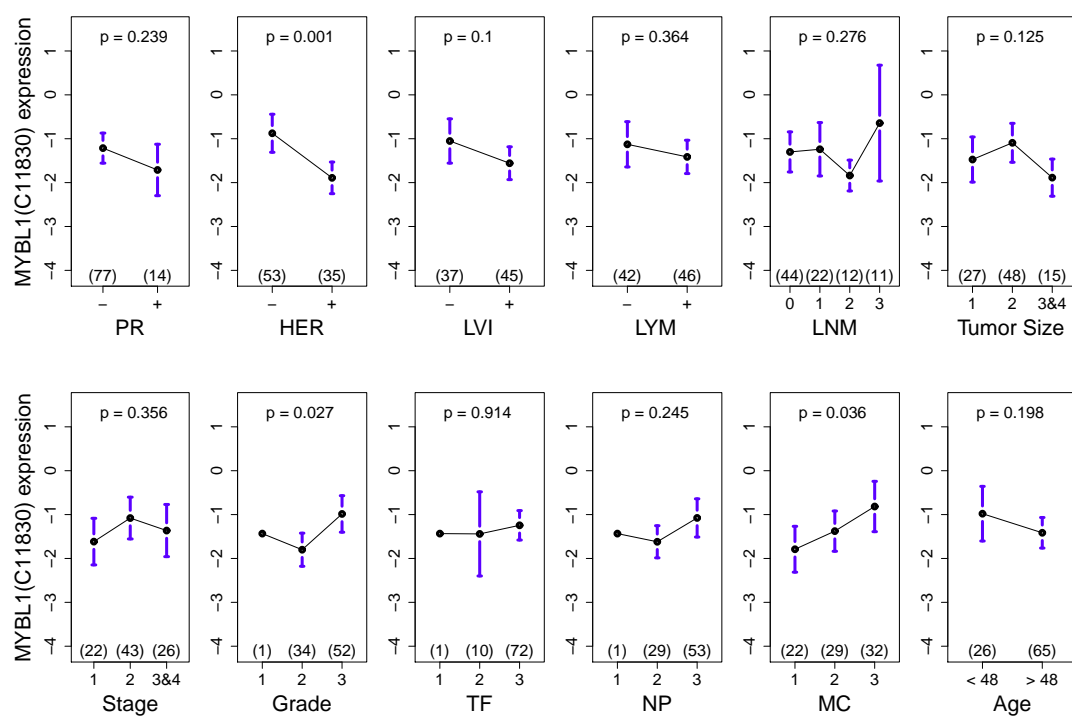

## C. Cohort 3.

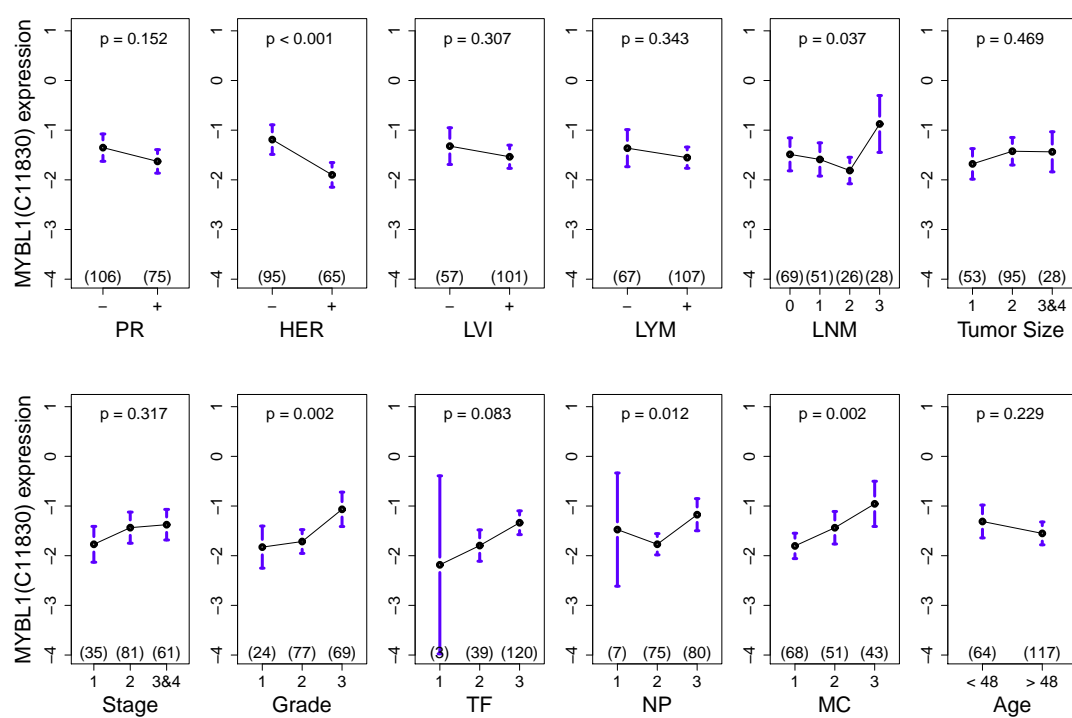

**Figure S7.6.** Mean plot analyses of mRNA levels for *MYBL2* (10757) in eight clinical categories and in three cohorts of infiltrating ductal carcinoma (IDCs), respectively. Lymphovascular invasion (LVI), nodal category (lymph node metastasis (LYM), number of nodal metastasis (LNM)), histological grade (Grade) category (nuclear pleomorphism (NP) and tubule formation (TF)) and stage were analyzed. Cohort 1 (90A) has Groups IE and IIE. Cohort 2 (91A) has ER(−) subtypes (see main text for definitions). Cohort 3 (181A) has cohorts 1 and 2.

A. Cohort 1.

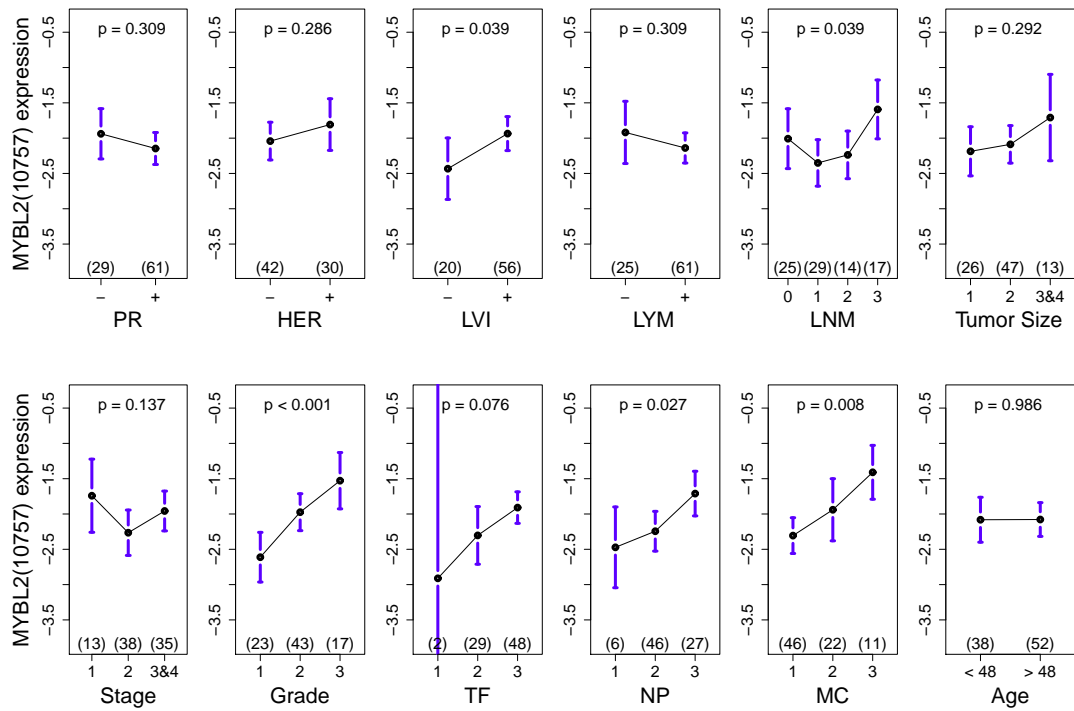

## B. Cohort 2.

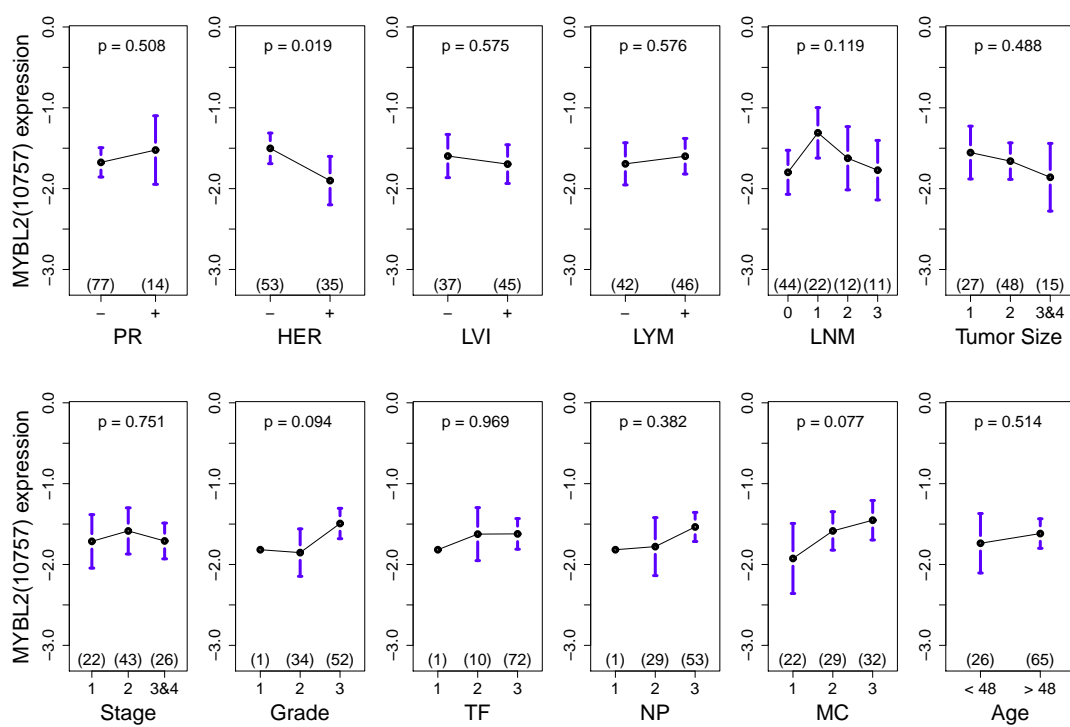

## C. Cohort 3.

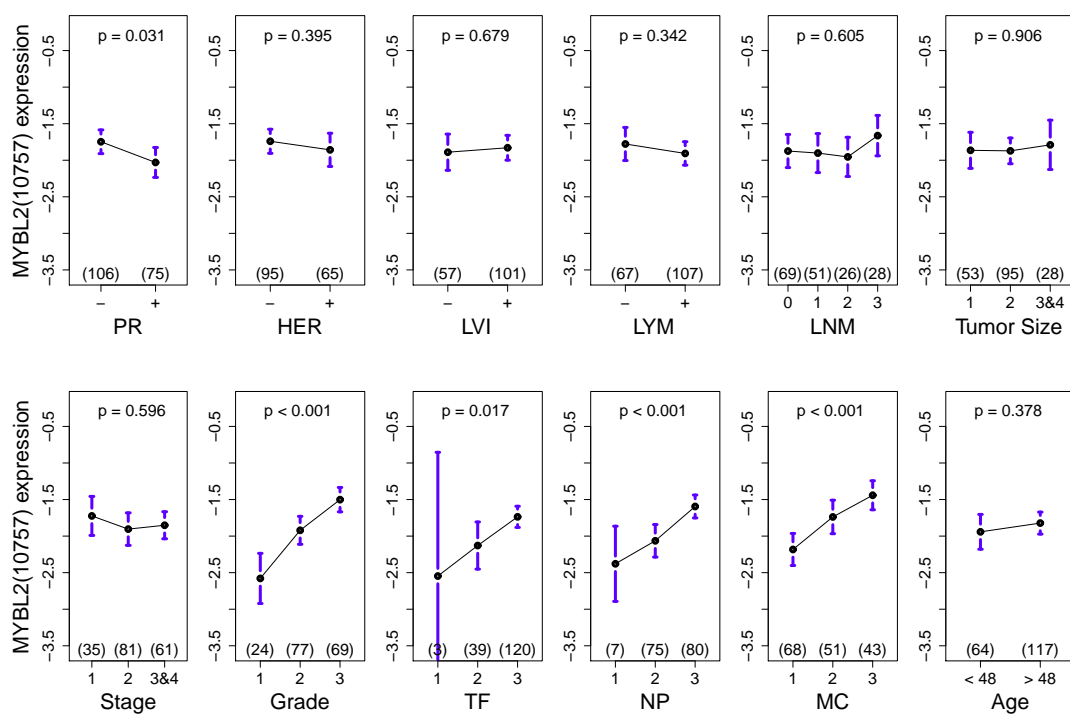

**Figure S8.1.** The heatmaps for the expression pattern of forty one probes in relation to the gene expression patterns of the four transcription factors (ARNT2, MYB, MYBL1 and MYBL2) in three cohorts.

18A cohort stands for non-tumor component(NT). 61A cohort stands for group IE subtype. 29A cohort stands for group IIE subtype.

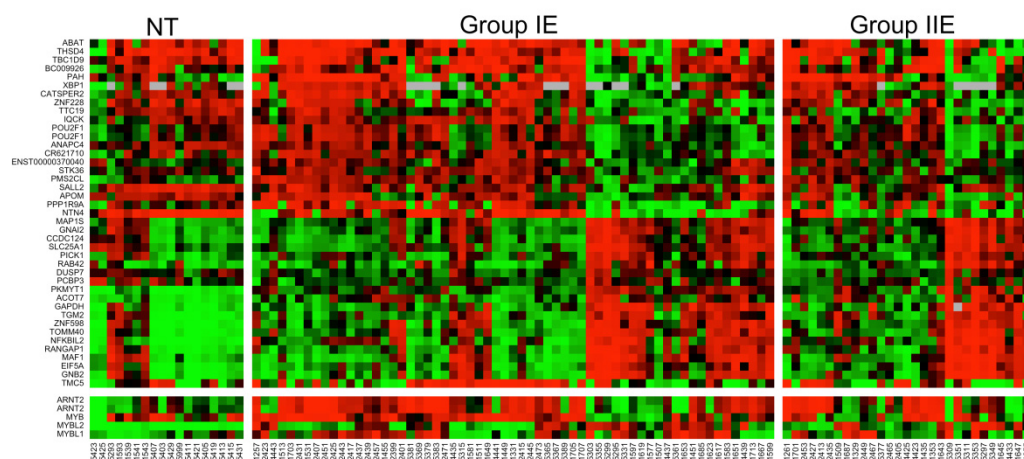

**Figure S8.2.** The heatmaps for the expression pattern of forty one probes in relation to the gene expression patterns of the four transcription factors (ARNT2, MYB, MYBL1 and MYBL2) in two cohorts.

25A cohort stands for non-tumor component (NT). 181A cohort stands for tumor component consisting of 90 ER(+) IDCs and 91 ER(-) IDCs.

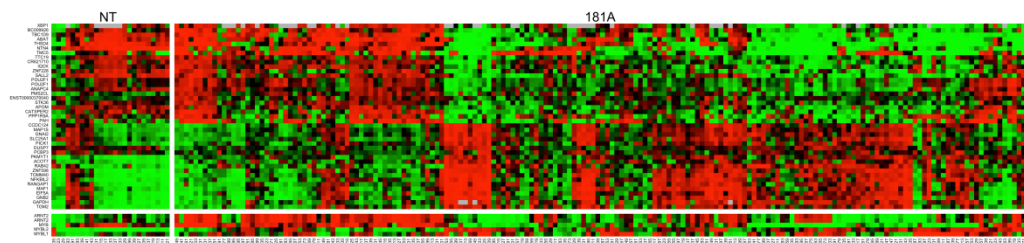

Supplement: Supplementary file 1 — There are eight supplemental files gathered to be the additional file 1. We collected the Venn diagram figures and their corresponding gene pools to form the unique table. It consists of supplemental files 1-4. The major results of survival analyses are listed in supplemental file 5. We have gathered the key results of the network analyses in supplemental file 6. It includes the clinical relevant gene profiling, the biochemical profiling and the partially validated results of the network analysis. We put the ANOVA test results of a few important transcriptions factors for showing their clinical impacts in supplemental file 7. The gene expression patterns of the 41-gene signature in two subtypes of ER(+) IDCs and 181 IDCs are shown in supplemental file 8. [file 813067.f1.pdf]
